1 **SGK phosphorylates Cdc25 and Myt1 to trigger cyclin B-Cdk1 activation at the**  
2 **meiotic G2/M transition**

3

4 Daisaku Hiraoka<sup>1\*</sup>, Enako Hosoda<sup>2</sup>, Kazuyoshi Chiba<sup>2</sup>, and Takeo Kishimoto<sup>1\*</sup>

5

6 <sup>1</sup>Science & Education Center, Ochanomizu University, Tokyo 112-8610, Japan.

7 <sup>2</sup>Department of Biological Sciences, Ochanomizu University, Tokyo 112-8610, Japan.

8

9 \*Correspondence to:

10 Daisaku Hiraoka: E-mail: [hiraoka.daisaku@ocha.ac.jp](mailto:hiraoka.daisaku@ocha.ac.jp), Tel: +81-3-5978-5370

11 Takeo Kishimoto: E-mail: [kishimoto.takeo@ocha.ac.jp](mailto:kishimoto.takeo@ocha.ac.jp), Tel: +81-3-5978-5370

12 **Abstract**

13 The kinase cyclin B-Cdk1 complex is a master regulator of M-phase in both mitosis and  
14 meiosis. At the G2/M transition, cyclin B-Cdk1 activation is initiated by a trigger that  
15 reverses the balance of activities between Cdc25 and Wee1/Myt1, and is further  
16 accelerated by autoregulatory loops. In somatic cell mitosis, this trigger was recently  
17 proposed to be the cyclin A-Cdk1/Plk1 axis. However, in the oocyte meiotic G2/M  
18 transition, in which hormonal stimuli induce cyclin B-Cdk1 activation, cyclin A-Cdk1  
19 is non-essential and hence the trigger remains elusive. Here, we show that SGK directly  
20 phosphorylates Cdc25 and Myt1 to trigger cyclin B-Cdk1 activation in starfish oocytes.  
21 After hormonal stimulation of the meiotic G2/M transition, SGK is activated by  
22 cooperation between the  $G\beta\gamma$ -PI3K pathway and an unidentified pathway downstream  
23 of  $G\beta\gamma$ , called the atypical  $G\beta\gamma$  pathway. These findings identify the trigger in oocyte  
24 meiosis and provide insights into the role and activation of SGK.

## 25 **Introduction**

26 Activation of cyclin-dependent kinase 1 complexed with cyclin B (cyclin B-Cdk1)  
27 induces entry into M-phase during somatic cell mitosis and germ cell meiosis<sup>1-3</sup>. Cyclin  
28 B-Cdk1 is regulated by synthesis and degradation of cyclin B, and by inhibitory  
29 phosphorylation of Cdk1 at Thr14 and Tyr15. These residues are phosphorylated by  
30 kinases belonging to the Wee1/membrane-associated tyrosine/threonine 1 (Myt1)  
31 family, but dephosphorylated by cell division cycle 25 (Cdc25)<sup>4</sup>. Cyclin B accumulates  
32 before and/or during M-phase entry. However, Wee1/Myt1 activity is dominant over  
33 Cdc25 activity before M-phase; therefore, cyclin B-Cdk1 remains inactive due to  
34 inhibitory phosphorylation. At M-phase entry, a small population of cyclin B-Cdk1 is  
35 first activated by a trigger that reverses the balance between Cdc25 and Wee1/Myt1  
36 activities, thereby making Cdc25 activity predominant. Thereafter, cyclin B-Cdk1 itself  
37 further accelerates dephosphorylation of Cdk1 via feedback loops, leading to maximal  
38 activation<sup>4-8</sup>. Although the molecular identity of the trigger of cyclin B-Cdk1 activation  
39 has received great attention, it remains elusive.

40 In mitotic M-phase entry (G2/M transition), the trigger may be affected by various  
41 factors, such as checkpoints<sup>5,9,10</sup>, and may involve redundant or stochastic processes<sup>5,9</sup>.  
42 At least in normal mitotic cell cycles, polo-like kinase 1 (Plk1) is activated by Aurora A  
43 in a cyclin A-Cdk1-dependent manner, and in turn phosphorylates Cdc25 to trigger  
44 activation of cyclin B-Cdk1<sup>11-13</sup>. Consistently, the cyclin A-Cdk1/Plk1 axis functions as  
45 the trigger for cyclin B-Cdk1 activation in the first embryonic cell division cycle<sup>14</sup>.

46 In contrast with mitotic cell cycles in proliferating somatic cells, meiotic cell  
47 cycles in animal oocytes mostly arrest at prophase of meiosis I (prophase-I), which  
48 corresponds to late mitotic G2 phase<sup>15</sup>. Release from this arrest is also induced by cyclin

49 B-Cdk1, which is activated downstream of extracellular hormonal stimuli<sup>16</sup>; hence this  
50 is known as the meiotic G2/M transition. However, this transition has not been reported  
51 to require cyclin A<sup>16-21</sup>. Furthermore, Plk1<sup>14,22,23</sup> and Aurora<sup>24-26</sup> are non-essential in  
52 some oocytes. Thus, mechanisms other than the cyclin A-Cdk1/Plk1 axis likely trigger  
53 cyclin B-Cdk1 activation at the meiotic G2/M transition in oocytes.

54 In vertebrate oocytes, meiotic G2 arrest requires cAMP-dependent protein kinase  
55 A (PKA), and downregulation of this kinase leads to meiotic G2/M transition<sup>16,20,27,28</sup>.  
56 In mice, PKA appears to directly upregulate Wee1B and downregulate Cdc25; however,  
57 it remains unclear how downregulation of PKA reverses the balance between Wee1B  
58 and Cdc25 activities to trigger cyclin B-Cdk1 activation<sup>29</sup>. In *Xenopus*, the hormone  
59 progesterone stimulates protein synthesis of Moloney sarcoma oncogene (Mos) and  
60 cyclin B, which redundantly trigger cyclin B-Cdk1 activation<sup>30</sup>. This redundant process  
61 is possibly mediated in two manners: activating phosphorylation of Cdc25 by  
62 Mos/mitogen activated protein kinase (MAPK) cascade, and inhibitory phosphorylation  
63 of Myt1 by newly synthesized cyclin B-associated Cdk1<sup>23</sup>. However, the molecular link  
64 between downregulation of PKA and *de novo* protein synthesis of Mos and cyclin B  
65 remains elusive<sup>31,32</sup>.

66 In contrast with vertebrate oocytes, the mechanisms by which activation of cyclin  
67 B-Cdk1 is triggered at the meiotic G2/M transition have been well studied in  
68 invertebrate starfish oocytes since the existence of a trigger kinase was first  
69 reported<sup>16,21,33</sup>. In starfish, cAMP and PKA are likely not involved in meiotic G2  
70 arrest<sup>34</sup>. The physiological maturation-inducing hormone 1-methyladenine (1-MeAde)  
71 induces the meiotic G2/M transition<sup>35</sup> without a requirement for new protein synthesis<sup>36</sup>.  
72 Cyclin A, Wee1, and Mos are not present, and Aurora and Plk are not required for

73 cyclin B-Cdk1 activation, in the meiotic G2/M transition<sup>14,19,25,37</sup>. In unstimulated  
74 oocytes, cyclin B is already accumulated<sup>38</sup>, but Myt1 inactivates cyclin B-Cdk1<sup>39</sup>.  
75 Stimulation by 1-MeAde is mediated by an unidentified cell surface G-protein-coupled  
76 receptor (GPCR), which induces dissociation of Gβγ from Gαi on the plasma  
77 membrane<sup>40-43</sup>. Gβγ binds to and activates phosphoinositide-3-kinase (PI3K), resulting  
78 in production of phosphatidylinositol 3,4,5-triphosphate (PI-345P<sub>3</sub>)<sup>44,45</sup>. Dependent on  
79 PI-345P<sub>3</sub>, phosphoinositide-dependent kinase 1 (PDK1) and target of rapamycin  
80 complex 2 (TORC2) phosphorylate Akt in its activation loop (A-loop) and hydrophobic  
81 motif (HM), respectively, leading to its activation<sup>46,47</sup>. Thereafter, Akt inactivates Myt1  
82 by directly phosphorylating Ser75 (ref. 39) and activates Cdc25 by directly  
83 phosphorylating multiple residues including Ser188 (ref. 48), resulting in reversal of the  
84 balance of Cdc25 and Myt1 activities, and consequently initial activation of cyclin  
85 B-Cdk1 (refs 33,39). These observations suggest that Akt likely represents the trigger  
86 kinase at the meiotic G2/M transition in starfish oocytes<sup>39</sup>.

87       Nevertheless, our recent observations suggested that the PI3K-Akt pathway is  
88 insufficient<sup>48</sup>. Expression of a constitutively active form of Akt (CA-Akt) induces the  
89 meiotic G2/M transition, but the required expression level of CA-Akt is 40-fold higher  
90 than that of endogenous Akt. Furthermore, expression of a constitutively active form of  
91 PI3K (CA-PI3K) induces Akt activation, but results in low levels of Cdc25 and Myt1  
92 phosphorylation and therefore fails to induce the meiotic G2/M transition. We reported  
93 that another pathway, called “the atypical pathway”, which is activated by Gβγ in  
94 parallel with PI3K activation, compensates for this insufficiency<sup>48</sup>. Although the  
95 molecular details of this pathway remain unclear, we proposed that it cooperates with  
96 the PI3K-Akt pathway to trigger cyclin B-Cdk1 activation<sup>48</sup>. One possibility is that

97 another kinase, which can redundantly phosphorylate Akt substrates, functions in these  
98 pathways to trigger cyclin B-Cdk1 activation.

99 One such candidate kinase is serum- and glucocorticoid-regulated kinase  
100 (SGK)<sup>49,50</sup>. SGK is a member of the AGC kinase family, which includes Akt<sup>51</sup>, and has  
101 the same substrate consensus motif (RXRXXS/T, where X represents any amino acid)  
102 as Akt<sup>52</sup>. In mammalian cells, similar to Akt, SGK family members are activated in a  
103 PI3K-dependent manner, dependent on phosphorylation of the A-loop and HM by  
104 PDK1 and TORC2, respectively<sup>52,53</sup>. However, the contribution of SGK to the meiotic  
105 G2/M transition has not been investigated.

106 Here, we carefully evaluated whether Akt and SGK play redundant roles in the  
107 meiotic G2/M transition in starfish oocytes. We showed that SGK is necessary and  
108 sufficient for the initial phosphorylation of Cdc25 and Myt1 to trigger cyclin B-Cdk1  
109 activation upon 1-MeAde stimulation. By contrast, although contradictory to our  
110 previous report<sup>39</sup>, inhibition of Akt did not affect the meiotic G2/M transition. Several  
111 experiments supported the importance of SGK, rather than of Akt. This discrepancy is  
112 discussed. Furthermore, as upstream pathways, we found that PI3K and the atypical  
113 Gβγ pathway cooperatively activate SGK. All these observations clearly explain the  
114 insufficiency of the PI3K-Akt pathway. Thus, our findings indicate that SGK is the  
115 trigger kinase at the meiotic G2/M transition in starfish oocytes, and provide new  
116 insights into SGK activation.

## 117 **Results**

### 118 **A newly generated phospho-specific antibody detects A-loop phosphorylation of** 119 **endogenous starfish Akt (sfAkt)**

120 In previous studies<sup>47,48</sup>, we monitored phosphorylation of the HM by immunoblotting as  
121 a marker of starfish Akt (sfAkt) activity because attempts to generate an antibody that  
122 detects the phosphorylated A-loop were unsuccessful. Nevertheless, it is important to  
123 analyze A-loop phosphorylation to precisely evaluate Akt activation. Thus, we again  
124 attempted to generate a phospho-specific antibody against a 17-amino acid  
125 phospho-peptide derived from the A-loop of sfAkt that includes phospho-Thr at the site  
126 of phosphorylation by PDK1 (Fig. 1a). In immunoblot analysis of whole-oocyte  
127 samples using this antibody, phosphorylation of sfAkt was detectable following  
128 1-MeAde stimulation only when Akt was overexpressed (Fig. 1b, closed arrowhead).  
129 When endogenous Akt was concentrated by immunoprecipitation using an antibody  
130 raised against a C-terminal fragment of sfAkt (anti-sfAkt-C antibody), the  
131 anti-phospho-A-loop antibody detected a band at the same size as Akt after 1-MeAde  
132 stimulation (Fig. 1c for input and flow-through, d for precipitate, closed arrowhead).  
133 The band disappeared upon treatment with the PDK1 inhibitor BX795 (Fig. 1d, closed  
134 arrowhead), indicating that the anti-phospho-A-loop antibody successfully detected  
135 A-loop phosphorylation of endogenous Akt by PDK1.

136

### 137 **SGK is activated after 1-MeAde stimulation in a PDK1- and TORC2-dependent** 138 **manner**

139 The phospho-A-loop antibody detected another band that migrated slightly slower (~60  
140 kDa) than Akt (Fig. 1b, c, open arrowhead). This band was still observed in

141 flow-through samples in which Akt had been removed by immunoprecipitation (Fig. 1c,  
142 open arrowhead) and disappeared in the presence of BX795 (Fig. 1c, open arrowhead).  
143 Thus, we speculated that the band corresponds to PDK1-dependent A-loop  
144 phosphorylation of a kinase other than Akt.

145 In parallel with our research, Hosoda et al. found that starfish SGK (sfSGK) is  
146 activated after 1-MeAde stimulation in starfish oocytes in a study of intracellular pH  
147 regulation as shown in the accompanying paper<sup>54</sup>. They isolated a cDNA encoding  
148 sfSGK and collaborated with us to generate an anti-sfSGK neutralizing antibody raised  
149 against a C-terminal peptide of sfSGK including the HM (anti-sfSGK-C antibody). A  
150 predicted molecular weight of sfSGK is 56 kDa, and eleven of the seventeen residues in  
151 the antigen peptide used to raise the anti-phospho-A-loop antibody against sfAkt are  
152 conserved in the A-loop of SGK (Fig. 1a). Thus, the other band detected by the  
153 anti-phospho-A-loop antibody may correspond to A-loop phosphorylation of SGK. The  
154 mobility of this band was the same as that of the top band of SGK detected by the  
155 anti-sfSGK-C antibody in 1-MeAde-treated oocytes (Fig. 1e, open arrowhead). In  
156 addition, the band disappeared after depletion of SGK from oocyte extracts (Fig. 1f),  
157 whereas it was detected in a sample of immunoprecipitated SGK (Fig. 1f), indicating  
158 that the anti-phospho-A-loop antibody also detects A-loop phosphorylation of sfSGK.  
159 Taken together, these results confirmed that SGK is activated after 1-MeAde  
160 stimulation.

161 SGK and Akt phosphorylate a Ser or Thr residue in the same consensus motif<sup>52</sup>  
162 and may therefore play a redundant role in 1-MeAde signaling. We next analyzed the  
163 dynamics of SGK activation in starfish oocytes in detail. As previously reported<sup>48</sup>,  
164 phosphorylation of Akt in the HM and phosphorylation of Cdc25 at Ser188 were



165 detected within 2 min after 1-MeAde addition (Fig. 1g). SGK was activated at a similar  
166 time (Fig. 1g, pA-loop). Thereafter, Tyr15 of Cdk1 was dephosphorylated, which is  
167 indicative of cyclin B-Cdk1 activation (Fig. 1g, 12 min and later). In mammalian cells,  
168 SGK is activated by phosphorylation of its A-loop and HM, which is catalyzed by  
169 PDK1 and mTORC2, respectively<sup>52,53</sup>. In addition, A-loop phosphorylation depends on  
170 HM phosphorylation<sup>52</sup>. In starfish oocytes, a mobility shift of SGK was still observed  
171 even when A-loop phosphorylation was abolished by BX795 (Fig. 1c). Using chemical  
172 inhibitors, Hosoda et al. suggested that this mobility shift represents TORC2-dependent  
173 phosphorylation<sup>54</sup>. Consistently, inhibition of TOR by microinjection of an anti-TOR  
174 neutralizing antibody<sup>47</sup> completely abolished the mobility shift of SGK after 1-MeAde  
175 stimulation (Fig. 1h). In these oocytes, A-loop phosphorylation of SGK was also  
176 abolished (Fig. 1h). Therefore, A-loop phosphorylation of SGK likely depends on  
177 TORC2-dependent HM phosphorylation in starfish oocytes, as reported in mammalian  
178 cells.

179

### 180 **SGK, but not Akt, is required for the meiotic G2/M transition**

181 Next, we examined the involvement of Akt and SGK in the meiotic G2/M transition. To  
182 this end, we specifically inhibited each kinase using antibodies. Non-specific bands  
183 were detected by immunoblotting of starfish oocytes with the anti-sfAkt-C antibody  
184 (Fig. 2a), but were not immunoprecipitated by this antibody (Fig. 2a). This indicates  
185 that the anti-sfAkt-C antibody does not interact with these non-specific proteins in  
186 non-denaturing conditions. In addition, although immunoprecipitates obtained using the  
187 anti-sfAkt-C antibody contained a trace amount of SGK (Fig. 1d, SGK with long  
188 exposure), this was not due to cross-reaction of SGK with this antibody because a

189 similar amount of SGK was detected in a control precipitation obtained using a control  
190 IgG (Fig. 1d, SGK with long exposure). Furthermore, the amount of SGK was not  
191 reduced in extracts after immunoprecipitation of Akt (Fig. 1c). These observations  
192 confirm the specificity of the anti-sfAkt-C antibody. The anti-sfSGK-C antibody  
193 specifically detected SGK by immunoblotting (Fig. 1e). In addition, the protein level of  
194 Akt remained constant before and after depletion of SGK using this antibody (Fig. 1f),  
195 confirming the specificity of the anti-sfSGK-C antibody.

196 The antigens of these antibodies include the phosphorylation site in the HM of  
197 each protein. Thus, the antibodies were expected to bind to the HM and block its  
198 phosphorylation. As expected, microinjection of the anti-sfAkt-C antibody abolished  
199 HM phosphorylation of Akt after 1-MeAde-stimulation (Fig. 2b). We previously  
200 suggested that A-loop phosphorylation of Akt depends on its HM phosphorylation in  
201 starfish oocytes based on analysis using exogenously expressed human Akt<sup>47</sup>.  
202 Consistently, A-loop phosphorylation was also disrupted by injection of the  
203 anti-sfAkt-C antibody (Fig. 2c, closed arrowhead). SGK was activated as normal in  
204 these oocytes (Fig. 2b, open arrowhead). Thus, the anti-sfAkt-C antibody specifically  
205 inhibits Akt. On the other hand, microinjection of the anti-sfSGK-C antibody disrupted  
206 both A-loop phosphorylation and the mobility shift of SGK after 1-MeAde stimulation  
207 (Fig. 2d) without affecting phosphorylation of Akt (Fig. 2d for HM, e for A-loop, closed  
208 arrowhead), indicating that this antibody specifically inhibits SGK.

209 We next examined the effect of microinjection of these antibodies on the meiotic  
210 G2/M transition. Oocytes were injected with the anti-sfAkt-C antibody and then treated  
211 with 1-MeAde. As a marker of the meiotic G2/M transition, we monitored germinal  
212 vesicle breakdown (GVBD), which is equivalent to nuclear envelope breakdown in

213 somatic cells. Surprisingly, GVBD occurred as normal in these Akt-inhibited oocytes  
214 (Fig. 2f). By contrast, microinjection of the anti-sfSGK-C antibody suppressed GVBD  
215 in a dose-dependent manner (Fig. 2g), suggesting that SGK, but not Akt, is required for  
216 the meiotic G2/M transition.

217 We previously reported that microinjection of an anti-sfAkt antibody inhibits the  
218 meiotic G2/M transition<sup>39</sup>. The antibody used in that previous study was raised against  
219 an 88-amino acid C-terminal fragment of sfAkt. In the present study, there were no  
220 stocks of the antiserum left and therefore we used an antibody purified from an  
221 antiserum raised against the same fragment of sfAkt in another rabbit. Thus, the  
222 specificity of the previously used antibody may differ from that of the presently used  
223 antibody. In addition, 33 of the 88 residues in the antigen peptide are conserved in  
224 sfSGK and therefore the previously used antibody may have cross-reacted with sfSGK  
225 and consequently inhibited SGK as well as Akt. Check of the specificity of this  
226 antibody was limited during our previous study because we lacked an anti-sfSGK  
227 antibody and phospho-specific antibodies against both sfAkt and sfSGK at that time.  
228

### 229 **SGK directly phosphorylates Cdc25 and Myt1 to trigger cyclin B-Cdk1 activation**

230 To trigger activation of cyclin B-Cdk1, we previously demonstrated that Cdc25 and  
231 Myt1 are activated and inactivated, respectively, by phosphorylation of Akt/SGK  
232 consensus motifs, which correspond to multiple sites including Ser188 in Cdc25 (ref.  
233 48), and Ser75 in Myt1 (ref. 39). Consistent with these previous findings and with the  
234 requirement of SGK for the meiotic G2/M transition, phosphorylation of Cdc25 at  
235 Ser188 and Myt1 at Ser75 was inhibited by injection of the anti-sfSGK-C antibody (Fig.  
236 2d), but not by injection of the anti-sfAkt-C antibody (Fig. 2b). Furthermore, in

237 Phos-tag SDS-polyacrylamide gel electrophoresis (PAGE) analysis, which emphasizes  
238 the mobility shifts of phosphorylated proteins, the upward shifts of Cdc25 and Myt1  
239 after 1-MeAde stimulation were completely inhibited by the anti-sfSGK-C antibody,  
240 but not by the anti-sfAkt-C antibody (Fig. 3a). This suggests that the regulatory  
241 phosphorylation of Cdc25 and Myt1 to trigger activation of cyclin B-Cdk1 depends on  
242 SGK, but not on Akt.

243 To investigate whether SGK directly phosphorylates Cdc25 and Myt1, *in vitro*  
244 phosphorylation experiments were performed using recombinant proteins. Attempts to  
245 prepare active recombinant sfSGK were unsuccessful; therefore, we used commercially  
246 available recombinant human SGK3 (hSGK3), which is the best related to sfSGK  
247 among the three isoforms of human SGK. Ser188 of starfish Cdc25 (sfCdc25) was  
248 phosphorylated upon incubation with hSGK3 (Fig. 3b). In addition, the mobility shift  
249 was still observed when Ser188 of sfCdc25 was substituted with Ala (Fig. 3b),  
250 suggesting that hSGK3 directly phosphorylates sfCdc25 at multiple residues including  
251 Ser188. This is consistent with the fact that sfCdc25 has five Akt/SGK consensus motifs.  
252 hSGK3 also phosphorylated Ser75 of starfish Myt1 (sfMyt1), leading to a slight  
253 mobility shift (Fig. 3c). Consistent with the fact that sfMyt1 has only one Akt/SGK  
254 consensus motif, the mobility shift of sfMyt1 was not observed when Ser75 was  
255 substituted with Ala (Fig. 3c), suggesting that Ser75 is the only site phosphorylated by  
256 hSGK3 in sfMyt1. These results suggest that Cdc25 and Myt1 are direct substrates for  
257 SGK in starfish oocytes.

258 The importance of SGK in 1-MeAde signaling was further supported by  
259 experiments using oocyte extracts. A GST-conjugated Akt/SGK substrate peptide  
260 (GST-AS peptide), which contained an Akt/SGK consensus motif, was incubated in

261 oocyte extracts. Thereafter, phosphorylation of the peptide was evaluated by  
262 immunoblotting with an anti-pan-phospho-Akt/SGK substrate antibody. The GST-AS  
263 peptide was not phosphorylated in the extract of unstimulated oocytes, but was  
264 phosphorylated in the extract of 1-MeAde-treated oocytes (Fig. 4a, b). This  
265 phosphorylation of the GST-AS peptide was not affected by immunodepletion of Akt  
266 (Fig. 4c for confirmation of Akt depletion and d, e for activity), but was abolished upon  
267 depletion of SGK (Fig. 4f for confirmation of SGK depletion and g, h for activity).  
268 These results suggest that SGK is a major kinase activated after 1-MeAde stimulation  
269 and phosphorylates the Akt/SGK consensus motif in starfish oocytes.

270 Taken together, these observations support the conclusion that SGK, but not Akt,  
271 is required for the regulatory phosphorylation that makes Cdc25 activity dominant over  
272 Myt1 activity to trigger cyclin B-Cdk1 activation.

273

274 **SGK is sufficient for the regulatory phosphorylation of Cdc25 and Myt1 to trigger**  
275 **cyclin B-Cdk1 activation at the meiotic G2/M transition**

276 Next, we investigated whether sfSGK is sufficient to trigger cyclin B-Cdk1 activation.  
277 Mammalian SGK3 and Akt have a regulatory domain N-terminal to their catalytic  
278 domain, which is named the PX domain and PH domain, respectively<sup>51</sup>. Binding of  
279 these domains to phosphoinositides on the cellular membrane contributes to activation  
280 of these kinases<sup>55,56</sup>. Membrane targeting of Akt via substitution of the PH domain with  
281 a myristoylation sequence results in its activation without extracellular stimulation<sup>39,47,57</sup>.  
282 To generate constitutively active sfSGK (CA-SGK), we substituted the PX domain of  
283 sfSGK with a myristoylation sequence. Furthermore, Thr479, which is the conserved  
284 phosphorylation site by TORC2, was substituted with Glu to mimic phosphorylation of

285 the HM. Injection of mRNA encoding CA-SGK into unstimulated oocytes induced  
286 GVBD (Fig. 5a). In these oocytes, the level of A-loop phosphorylation of CA-SGK at  
287 GVBD was comparable to that of endogenous SGK after 1-MeAde stimulation (Fig. 5b,  
288 c), suggesting that CA-SGK is activated in the absence of 1-MeAde stimulation and that  
289 activation of SGK is sufficient to induce the meiotic G2/M transition.

290 We then examined whether CA-SGK expression induces the regulatory  
291 phosphorylation of Cdc25 and Myt1 to trigger cyclin B-Cdk1 activation. To analyze  
292 CA-SGK-induced signaling without any effect of Cdk-dependent feedback pathways,  
293 CA-SGK was expressed in the presence of the Cdk inhibitor roscovitine. These oocytes  
294 were collected at the time point at which 50% of CA-SGK-expressing oocytes exhibited  
295 GVBD in the absence of roscovitine (5 h and 45 min in Fig. 5a). Although expression  
296 and A-loop phosphorylation levels of CA-SGK were lower than those of endogenous  
297 SGK (Fig. 5d, pA-loop), phosphorylation of Cdc25 at Ser188 and of Myt1 at Ser75  
298 were detectable in these oocytes (Fig. 5d). Taken together, these findings suggest that  
299 activation of SGK is sufficient for the regulatory phosphorylation of Cdc25 and Myt1 to  
300 trigger cyclin B-Cdk1 activation.

301

### 302 **SGK is activated by cooperation of the G $\beta$ $\gamma$ -PI3K and atypical G $\beta$ $\gamma$ pathways in** 303 **starfish oocytes**

304 In a previous report<sup>48</sup>, we proposed the existence of an atypical G $\beta$  $\gamma$  pathway that is  
305 activated by G $\beta$  $\gamma$  and cooperates with the G $\beta$  $\gamma$ -PI3K pathway to induce the meiotic  
306 G2/M transition. Therefore, we examined whether SGK is activated by these pathways.

307 First, we investigated whether SGK is activated by signaling pathways  
308 downstream of G $\beta$  $\gamma$ . Expression of exogenous G $\beta$  $\gamma$  induced the meiotic G2/M transition

309 as previously reported<sup>48</sup>, whereas Gβγ-induced GVBD was inhibited by microinjection  
310 of the anti-sfSGK-C antibody, but not by injection of the anti-sfAkt-C antibody (Fig.  
311 6a). These findings indicate that signaling from exogenous Gβγ induces the meiotic  
312 G2/M transition in a SGK-dependent manner, similar to 1-MeAde stimulation.  
313 Consistently, immunoblot analysis showed that SGK was activated upon expression of  
314 Gβγ (Fig. 6b). Furthermore, when Gβγ was expressed in the presence of the Cdk  
315 inhibitor roscovitine, thereby avoiding any effect of cell cycle progression on signal  
316 transduction, the level of A-loop phosphorylation of sfSGK was comparable to that  
317 induced by 1-MeAde (Fig. 6c), suggesting that sfSGK is activated downstream of Gβγ  
318 independently of Cdk activity. However, 1-MeAde- and Gβγ-induced SGK activation  
319 was abolished upon inhibition of PI3K by wortmannin (Fig. 6d), suggesting that  
320 activation of sfSGK by Gβγ requires PI3K.

321 Next, to determine whether PI3K activation solely induces SGK activation,  
322 CA-PI3K was expressed in unstimulated oocytes. As previously reported<sup>48</sup>, CA-PI3K  
323 induced HM phosphorylation of Akt (Fig. 6e), but not the meiotic G2/M transition. In  
324 these oocytes, A-loop phosphorylation of SGK was only detectable by immunoblotting  
325 with a long time exposure for acquisition of the chemiluminescent image (Fig. 6e,  
326 pA-loop with long exposure, open arrowhead), indicating that activation of PI3K barely  
327 induces activation of SGK.

328 Taken together, Gβγ activates SGK in a PI3K-dependent manner, but activation of  
329 PI3K alone is insufficient for SGK activation. These observations suggest that Gβγ  
330 activates not only PI3K but also another pathway(s), which we call the atypical Gβγ  
331 pathway, and that cooperation of the Gβγ-PI3K and atypical Gβγ pathways leads to

332 activation of SGK.

333 As to activation of Akt, CA-PI3K induced HM phosphorylation of Akt (Fig. 6e),  
334 as previously reported<sup>48</sup>. In these oocytes, the anti-phospho-A-loop antibody detected a  
335 weak band at the same mobility as Akt by immunoblotting after a long exposure (Fig.  
336 6e, pA-loop with long exposure, closed arrowhead) even in whole-oocyte samples. This  
337 band disappeared after immunodepletion of Akt from the oocyte extract (Fig. 6e),  
338 showing that it corresponds to A-loop phosphorylation of Akt. Given that the level of  
339 1-MeAde-induced A-loop phosphorylation of Akt was below the threshold of detection  
340 in whole-oocyte samples (Fig. 1b–d), Akt is activated more strongly by CA-PI3K than  
341 by 1-MeAde. This further indicates that activation of endogenous Akt is insufficient for  
342 the meiotic G2/M transition. By contrast, in G $\beta\gamma$ -expressing oocytes, A-loop  
343 phosphorylation of Akt was undetectable even in immunoprecipitated Akt samples (Fig.  
344 6f, closed arrowhead), although HM phosphorylation was comparable to that in  
345 1-MeAde-treated oocytes (Fig. 6c, Akt-pHM in Input). This suggests that G $\beta\gamma$  signaling  
346 is insufficient for A-loop phosphorylation of Akt. This finding will be discussed later.



347 **Discussion**

348 This study showed that SGK is necessary and sufficient for the regulatory  
349 phosphorylation of Cdc25 and Myt1 to trigger activation of cyclin B-Cdk1 in the  
350 meiotic G2/M transition. Furthermore, we revealed that SGK is activated by  
351 cooperation of the G $\beta$  $\gamma$ -PI3K and atypical G $\beta$  $\gamma$  pathways downstream of 1-MeAde  
352 stimulation (Fig. 7). These findings clarify the molecular identity of the trigger kinase,  
353 and offer important clues to elucidate the 1-MeAde signaling pathway. Moreover, they  
354 provide new insights into the role and regulation of SGK.

355 In *Xenopus* oocytes, multiple pathways are proposed to reverse the balance  
356 between the activities of Cdc25 and Myt1 (refs 23,30). Therefore, it is difficult to  
357 determine the relative contribution of each pathway. In this context, SGK is the only  
358 trigger kinase in starfish oocytes because it is necessary and sufficient for the regulatory  
359 phosphorylation of Cdc25 and Myt1. Particularly, the phosphorylation of Cdc25 and  
360 Myt1 was undetectable in SGK-inhibited oocytes (Fig. 2). In mouse oocytes, Cyclin  
361 B-Cdk1 activation might be triggered by a phosphatase antagonistic to PKA, rather than  
362 by kinases, and it is unclear whether the activity of this phosphatase is regulated at the  
363 meiotic G2/M transition<sup>29</sup>. Thus, our present study is the first time that the trigger  
364 kinase in oocyte meiosis has been clearly identified. To the best of our knowledge, this  
365 is the first report that SGK is involved in M-phase entry.

366 In parallel, Hosoda et al. in the accompanying paper showed that sfSGK is  
367 required for the increase in intracellular pH after 1-MeAde stimulation in starfish  
368 oocytes<sup>54</sup>. They suggested that the increase in intracellular pH is not involved in cyclin  
369 B-Cdk1 activation, but is required for progression of GVBD after full activation of  
370 cyclin B-Cdk1 in ovarian oocytes. The functions of SGK have been mainly studied in

371 mammalian cells, which express three SGK isoforms: SGK1, SGK2, and SGK3<sup>51</sup>.  
372 Although mammalian SGKs are reportedly involved in various processes, such as cell  
373 survival, stress responses, and tumorigenesis, in somatic cells<sup>58,59</sup>, their functions in  
374 germ cells remain unclear. To the best of our knowledge, studies presented here and in  
375 the paper by Hosoda et al.<sup>54</sup> are the first indication of the functions of SGK in germ  
376 cells.

377       Among the three mammalian SGK isoforms, only SGK3 contains a regulatory  
378 domain, called the PX domain, N-terminal to the kinase domain<sup>51,60</sup>. sfSGK also has a  
379 PX domain and is therefore likely an ortholog of mammalian SGK3 (ref. 54). The PX  
380 domain of mammalian SGK3 binds to phosphatidylinositol 3-phosphate (PI-3P), which  
381 is a phosphorylated derivative of phosphatidylinositol (PI) at the 3-position of the  
382 inositol ring<sup>56</sup>. This interaction is essential for the localization and activation of SGK3  
383 (refs 50,56). PI-3P is generated by dephosphorylation of PI-345P<sub>3</sub> at the 4- and  
384 5-positions of the inositol ring<sup>50</sup>. PI3K, which produces PI-345P<sub>3</sub> from PI-45P<sub>2</sub>, is  
385 activated in signaling pathways downstream of receptor tyrosine kinases and GPCRs<sup>45</sup>.  
386 Thus, production of PI-3P from PI-345P<sub>3</sub> may occur downstream of these receptors.  
387 Indeed, a recent report suggested that this mechanism is implicated in activation of  
388 SGK3 after stimulation by IGF-1, which is an agonist for a receptor tyrosine kinase<sup>61</sup>. In  
389 this context, SHIP2 and INPP4A/B were proposed to be phosphatases for PI-3P  
390 production, although the regulatory mechanisms remain elusive<sup>61</sup>. Furthermore, it is  
391 unclear whether PI-345P<sub>3</sub> is a source of PI-3P for SGK activation in GPCR-dependent  
392 signaling. We previously reported that PI-345P<sub>3</sub> is generated on the plasma membrane  
393 after 1-MeAde stimulation in starfish oocytes<sup>48</sup>. This PI-345P<sub>3</sub> may be metabolized to  
394 PI-3P for SGK activation. Our present results suggest that the atypical Gβγ pathway

395 cooperates with PI3K to activate sfSGK (Fig. 6). Thus, we propose that the atypical  
396 Gβγ pathway activates phosphatases that produce PI-3P from PI-345P<sub>3</sub> downstream of  
397 GPCR-mediated signaling.

398 Another mechanism for PI-3P production is phosphorylation of PI at the  
399 3-position, which occurs on early endosomes during intracellular vesicle trafficking and  
400 endocytosis<sup>45,50</sup>. GPCRs are frequently endocytosed after agonist stimulation<sup>62</sup>. Thus,  
401 1-MeAde may induce endocytosis, which increases the level of early endosomes. If this  
402 is the case, the endocytic pathway may also contribute to activation of SGK in starfish  
403 oocytes. Many aspects of these scenarios, such as the dynamics of PI-3P, the  
404 localization of SGK, and the molecular identity of the atypical Gβγ pathway, remain  
405 unclear. Nonetheless, these working models could be tested in future studies and may  
406 help to elucidate the regulatory mechanisms of SGK3 activation in mammalian somatic  
407 cells.

408 SGKs and Akt reportedly play redundant roles in some contexts<sup>59</sup>. In starfish  
409 oocytes, Akt has been reported to have a potential to trigger cyclin B-Cdk1 activation<sup>39</sup>.  
410 Indeed, an excess amount of CA-Akt expression can induce the meiotic G2/M  
411 transition<sup>39,48</sup>. Furthermore, regulatory effects of phosphorylation of the Akt/SGK  
412 consensus motifs on Myt1 and Cdc25 activities were originally showed using Akt as a  
413 kinase in *in vitro* experiments<sup>39,48</sup>. Nonetheless, our present results showed that SGK is  
414 predominantly responsible for these phosphorylation *in ovo*. Contribution of Akt was, if  
415 any, undetectable (Fig. 2) possibly due to its weak activation, as supported by low  
416 levels of A-loop phosphorylation (Figs. 1) and by the kinase assay using oocyte extracts  
417 (Fig. 5). The role of Akt may be other than the triggering of cyclin B-Cdk1 activation.  
418 Even so, we cannot exclude the possibility that Akt makes a significant contribution to

419 the triggering as a redundant kinase with SGK in a limited number of unknown  
420 circumstances in which Akt is more abundant than SGK in oocytes.

421 Contrary to our present conclusion, we previously reported that Akt is necessary  
422 for the meiotic G2/M transition<sup>39</sup>. In our previous report, in addition to the anti-sfAkt  
423 antibody, we also used competitive peptides derived from the A-loop or HM of Akt to  
424 inhibit Akt activation. Akt and SGK have common upstream kinases; therefore, peptide  
425 competition likely inhibited activation of both Akt and SGK. In the present study,  
426 successful generation of anti-phospho-A-loop and anti-sfSGK-C antibodies enabled us  
427 to evaluate the specificities of the neutralizing antibodies more precisely. In addition,  
428 Akt was dispensable at least in all cases tested in the current study, which used oocytes  
429 isolated from six starfish collected at three different areas in Japan. Thus, our current  
430 conclusions are more convincing than our previous conclusions.

431 We made some interesting observations regarding activation of Akt. Distinct from  
432 SGK, activation of Akt depends on binding of PI-345P<sub>3</sub> to its PH domain<sup>59</sup>. Expression  
433 of CA-PI3K, but not of Gβγ, induced A-loop phosphorylation of Akt (Fig. 6e, f). We  
434 previously reported that a comparable level of PI-345P<sub>3</sub> is produced upon 1-MeAde  
435 stimulation and Gβγ expression, while CA-PI3K induces a higher level of PI-345P<sub>3</sub> (ref.  
436 48). Thus, it is possible that a high level of PI-345P<sub>3</sub> alone can induce Akt activation,  
437 whereas a low level of PI-345P<sub>3</sub> requires an additional mechanism to enhance A-loop  
438 phosphorylation. In addition, it should be noted that the levels of HM phosphorylation  
439 induced by CA-PI3K and exogenous Gβγ were comparable to that induced by 1-MeAde  
440 stimulation (Fig. 6c, e). Thus, the threshold level of PI-345P<sub>3</sub> required for HM  
441 phosphorylation may be lower than that required for A-loop phosphorylation.

442 In summary, we identified SGK as the trigger kinase for activation of cyclin

443 B-Cdk1 at M-phase entry and as the target of the collaborative actions of PI3K and the  
444 atypical G $\beta$  $\gamma$  pathway. These findings not only demonstrate the novel role of SGK in  
445 the triggering of M-phase, but also provide insights into the regulatory mechanisms of  
446 SGK activation, particularly with regard to PI-3P production.

447 **Methods**

448 **Chemicals.** Roscovitine (Calbiochem), wortmannin (LC Laboratories), and BX795  
449 (Enzo Life Sciences) were dissolved in DMSO at concentrations of 50, 20, and 6 mM,  
450 respectively, as stock solutions and used at final concentrations of 45, 40, and 6  $\mu$ M,  
451 respectively.

452

453 **DNA constructs.** For CA-SGK, an N-terminal fragment of sfSGK containing the PX  
454 domain (Met1–Asp132) was substituted with a myristoylation sequence  
455 (MGSSKSKPKDPSQR) by PCR. Thereafter, the insert was cloned into a modified  
456 pSP64-S vector, in which the SP6 promoter for *in vitro* transcription had been  
457 substituted by a T7 promoter sequence<sup>48,63</sup>, using an In-Fusion kit (Takara Bio). Finally,  
458 Thr479 in the HM was substituted with Glu by PCR, and the point mutation was  
459 verified by sequencing. Constructs encoding untagged sfAkt, CA-PI3K in which Flag  
460 tag and plasma membrane-targeting sequence including a CAAX motif fused to the N-  
461 and C-terminus of the p110 catalytic subunit of sfPI3K, respectively, untagged starfish  
462 G $\beta$  (sfG $\beta$ ), and untagged starfish G $\gamma$  (sfG $\gamma$ ) for mRNA preparation were prepared as  
463 described previously<sup>48</sup>.

464

465 **Preparation of recombinant proteins.** Recombinant sfMyt1 (N229A for the  
466 kinase-dead mutant or S75A mutant) cloned into the pGEX-4T-1 vector was expressed  
467 in *Escherichia coli* (*E. coli*) strain BL21 (DE3) (Invitrogen) as an N-terminal  
468 GST-tagged protein, purified using glutathione-Sepharose 4B beads (GE Healthcare),  
469 and dialyzed against storage buffer (20 mM PIPES pH 6.8, 200 mM sucrose, and 1 mM  
470 DTT). For His<sub>6</sub>-Cdc25 (wild-type or S188A mutant), *E. coli* strain BL21 (DE3) was

471 transformed with the pET21a construct. Expressed His<sub>6</sub>-Cdc25 were purified from  
472 inclusion bodies under denaturing conditions (6 M urea) using Probond-Resin  
473 (Invitrogen) and then refolded via stepwise reduction of the urea concentration by  
474 dialysis using EasySep (TOMY) for 2 h against Tris-buffered saline (TBS; 50 mM Tris  
475 and 150 mM NaCl, pH 7.5) containing 4 M urea, for 2 h against TBS containing 2 M  
476 urea, and for 2 h against TBS lacking urea. To prepare the recombinant GST-fused AS  
477 peptide (AGRPRAAATFIESG), *E. coli* strain BL21-CodonPlus-RIL (Agilent  
478 Technologies) was transformed with the pGEX-4T-1 construct. The expressed GST-AS  
479 peptide was purified using glutathione-Sepharose 4B and dialyzed against  
480 phosphate-buffered saline (137 mM NaCl, 2.68 KCl, 10 mM Na<sub>2</sub>HPO<sub>4</sub>, and 1.76 mM  
481 KH<sub>2</sub>PO<sub>4</sub>, pH 7.4). A recombinant C-terminal 88-amino acid fragment of sfAkt was  
482 prepared as previously described<sup>39</sup>.

483

484 **Antibody generation.** Antibodies were generated by immunizing rabbits (Biologica)  
485 and then purified using antigens. Antigens used for immunization and antibody  
486 purification were a phospho-peptide of the A-loop of sfAkt (Thr304–Pro320,  
487 phosphorylated at Thr315) for the anti-phospho-A-loop antibody, a C-terminal peptide  
488 of sfSGK (Ser473–Asp489) for the anti-sfSGK-C antibody<sup>54</sup>, and a C-terminal  
489 88-amino acid fragment of sfAkt for the anti-sfAkt-C antibody. Control IgG for  
490 microinjection or immunoprecipitation was purified from rabbit pre-immune serum  
491 using protein A-Sepharose 4B (Sigma).

492

493 **Oocyte preparation.** Starfish *Asterina pectinifera* (renamed *Patiria pectinifera* in the  
494 2007 National Center for Biotechnology Information Taxonomy Browser) was collected

495 during the breeding season and kept in laboratory aquaria supplied with circulating  
496 seawater at 14°C. Fully grown unstimulated oocytes with follicle cells were manually  
497 isolated from ovaries using forceps. Thereafter, the follicle cells were removed by  
498 washing oocytes with calcium-free artificial seawater (476 mM NaCl, 10 mM KCl, 36  
499 mM MgCl<sub>2</sub>, 18 mM MgSO<sub>4</sub>, and 20 mM H<sub>3</sub>BO<sub>3</sub>, pH 8.2). All treatments with 1-MeAde  
500 or other chemicals, as well as microinjections, were performed in artificial seawater  
501 (ASW; 462 mM NaCl, 9 mM CaCl<sub>2</sub>, 10 mM KCl, 36 mM MgCl<sub>2</sub>, 18 mM MgSO<sub>4</sub>, and  
502 20 mM H<sub>3</sub>BO<sub>3</sub>, pH 8.2) at 23°C. Oocytes were stimulated with 0.5 μM 1-MeAde.

503

504 **Immunoblotting.** Oocytes were lysed by vortexing in Laemmli sample buffer (LSB)  
505 and then heated at 95°C for 5 min. Proteins were separated by SDS-PAGE<sup>64</sup> on an 8%  
506 or 8.5% gel (separating gel: 8% or 8.5% acrylamide, 0.22% or 0.23%  
507 N,N'-methylenebisacrylamide, 375 mM Tris, 0.1% SDS, 0.1% APS, and 0.1% TEMED,  
508 pH 8.8; stacking gel: 3.6% acrylamide, 0.096% N,N'-methylenebisacrylamide, 120 mM  
509 Tris, 0.1% SDS, 0.2% APS, and 0.1% TEMED, pH 6.8; and electrophoresis buffer: 25  
510 mM Tris, 192 mM glycine, and 0.1% SDS) and transferred to a PVDF membrane  
511 (Millipore)<sup>65</sup> using transfer buffer (100 mM Tris, 192 mM glycine, 0.1% SDS, and 20%  
512 methanol). Phos-tag SDS-PAGE was performed in accordance with the manufacturer's  
513 protocol using an 8% polyacrylamide gel containing 4 μM Phos-tag (FUJIFILM) and 8  
514 μM MnCl<sub>2</sub>. A modified 15% gel and buffer were used to detect Gy (separating gel: 15%  
515 acrylamide, 0.41% N,N'-methylenebisacrylamide, 750 mM Tris, 0.1% SDS, 0.1% APS,  
516 and 0.1% TEMED, pH 8.8; stacking gel: 3.6% acrylamide, 0.096%  
517 N,N'-methylenebisacrylamide, 240 mM Tris, 0.1% SDS, 0.2% APS, and 0.1% TEMED,  
518 pH 6.8; and electrophoresis buffer: 50 mM Tris, 384 mM glycine, and 0.1% SDS). The



519 membranes were then blocked by incubation in blocking buffer (5% skimmed milk  
520 prepared in TBS containing 0.1% Tween-20 (TBS-T)) for 1 h for the  
521 anti-phospho-sfMyt1-Ser75, anti-sfMyt1, and anti-GST antibodies, but not for the other  
522 antibodies. The primary antibodies were anti-phospho-A-loop (purified, 1:50 in TBS-T),  
523 anti-sfAkt-C (purified, 1:1,000 in Can Get Signal Solution 1),  
524 anti-phospho-sfAkt-Ser477 (ref. 47, purified, 1:1,000 in Can Get Signal Solution 1),  
525 anti-sfSGK-C (purified, 1:2,000 in Can Get Signal Solution 1),  
526 anti-phospho-sfCdc25-Ser188 (ref. 48, serum, 1:1,000 in Can Get Signal Solution 1),  
527 anti-sfCdc25 (ref. 33, serum, 1:2,000 in Can Get Signal Solution 1),  
528 anti-phospho-Cdk1-Tyr15 (Cell Signaling Technology, 1:1,000 in Can Get Signal  
529 Solution 1), anti-PSTAIR<sup>47</sup> to detect Cdk1 (1:50,000 in Can Get Signal Solution 1),  
530 anti-phospho-sfMyt1-Ser75 (ref. 48, purified, 1:100 in blocking buffer), anti-sfMyt1<sup>39</sup>  
531 (purified, 1:200 in TBS-T), anti-GST (GE Healthcare, 1:500 in blocking buffer),  
532 anti-pan-phospho-Akt/SGK substrate (Cell Signaling Technology, 1:1,000 in Can Get  
533 Signal Solution 1), anti-sfp110 $\beta$  to detect sfPI3K<sup>48</sup> (purified, 1:1,000 in Can Get Signal  
534 Solution 1), anti-sfG $\beta$ <sup>48</sup> (serum, 1:1,000 in Can Get Signal Solution 1), and anti-sfG $\gamma$ <sup>48</sup>  
535 (purified, 1:100 in Can Get Signal Solution 1). Horseradish peroxidase-conjugated  
536 secondary antibodies were anti-goat IgG (Sigma, 1:500 in blocking buffer for anti-GST  
537 antibody), anti-mouse IgG (Dako, 1:2,000 in Can Get Signal Solution 2 for  
538 anti-PSTAIR antibody), and anti-rabbit IgG (GE Healthcare; 1:2,000 in TBS-T for  
539 anti-phospho-A-loop, anti-sfSGK-C, anti-phospho-sfMyt1-Ser75, and  
540 anti-pan-phospho-Akt/SGK substrate antibodies; in blocking buffer for the anti-sfMyt1  
541 antibody; and in Can Get Signal Solution 2 for the other antibodies). When the signal  
542 derived from IgG heavy chains hampered detection, TrueBlot (ROCKLAND, 1:2,000 in

543 Can Get Signal Solution 2) was used instead of the secondary antibody. Signals were  
544 visualized with ECL Prime (GE Healthcare), and digital images were acquired on a  
545 LAS4000 mini imager (Fujifilm). Quantitation was performed using ImageJ (National  
546 Institutes of Health, USA). Graphs were generated using Microsoft Excel. Brightness  
547 and contrast were adjusted using ImageJ.

548

549 **Microinjection.** Microinjection was performed as described previously<sup>66</sup>. mRNAs for  
550 exogenous protein expression in starfish oocytes were transcribed from pSP64-S  
551 constructs using a mMACHINE kit (Ambion), dissolved in water, and  
552 injected into unstimulated oocytes (20 pg for sfAkt, 20 pg for CA-SGK, and 40 pg for  
553 CA-PI3K). To express starfish G $\beta\gamma$ , 50 pg of an equimolar mixture of mRNAs encoding  
554 sfG $\beta$  and sfG $\gamma$  was injected. The incubation time for protein expression was determined  
555 based on the amount of time taken to induce GVBD or to induce HM phosphorylation  
556 of Akt to a comparable extent as that induced by 1-MeAde. For microinjection of  
557 antibodies, concentration of antibodies and buffer exchange with phosphate-buffered  
558 saline were performed using a 50 k cutoff Amicon Ultra filter (Millipore). Nonidet P-40  
559 (NP-40) was added at a final concentration of 0.05%. Unstimulated oocytes were  
560 injected with 230 pg of the anti-TOR antibody, 85 pg of the anti-sfAkt-C antibody, or  
561 200 pg of the anti-sfSGK-C antibody. 1-MeAde was added after incubation for 1 h.

562

563 **Immunoprecipitation and immunodepletion.** To prepare antibody-bound beads,  
564 antibodies (anti-sfAkt antibody, 2.5  $\mu\text{g}/\mu\text{l}$  beads, 0.83  $\mu\text{g}$  for 10 oocytes; and  
565 anti-sfSGK antibody, 2  $\mu\text{g}/\mu\text{l}$  beads, 2.7  $\mu\text{g}$  for 10 oocytes) were incubated with Protein  
566 A-Sepharose (Sigma) for more than 2 h on ice. Antibody-bound beads were washed

567 with TBS and lysis buffer (80 mM  $\beta$ -glycerophosphate, 20 mM EGTA, 10 mM MOPS  
568 pH 7.0, 100 mM sucrose, 100 mM KCl, 1 mM DTT, 1 $\times$  cOmplete EDTA-free (Merck),  
569 0.5 mM sodium orthovanadate, 1  $\mu$ M okadaic acid (Calbiochem), and 0.5% NP-40) and  
570 used for immunoprecipitation. For cross-linking, antibody-bound beads were washed  
571 with TBS and borate buffer (0.2 M NaCl and 0.2 M boric acid pH 9.0) and then  
572 incubated with 3.75 mM disuccinimidyl suberate prepared in borate buffer at 24°C for  
573 30 min. Thereafter, the supernatant was discarded and the beads were further incubated  
574 in 1 M ethanolamine (pH 8.0) at 24°C for 15 min and finally washed with TBS and lysis  
575 buffer. For immunoprecipitation, freeze-thawed oocytes in ASW (10 oocytes/ $\mu$ l of  
576 ASW for immunoprecipitation of Akt and SGK) were lysed by adding 6 volumes of  
577 lysis buffer and incubating samples on ice for 30 min, followed by gentle vortexing.  
578 Lysates were centrifuged at 20 k  $\times$  g at 4°C for 15 min. The supernatant represented the  
579 oocyte extract. Antibody-bound beads were incubated with the oocyte extract (60  
580 oocytes for immunoprecipitation of Akt, 30 oocytes for depletion of Akt, and 15  
581 oocytes for immunoprecipitation and depletion of SGK) for 90 min on ice, separated  
582 from flow-through extracts, and washed with lysis buffer. For immunoprecipitation of  
583 Akt from oocytes that had been injected with the anti-sfSGK antibody, extracts were  
584 pre-incubated with protein A-Sepharose 4B to remove injected IgG. LSB was added to  
585 the input extracts, flow-through extracts, and beads for immunoblot analysis. All  
586 samples were then heated at 95°C for 5 min and subjected to SDS-PAGE. To prepare  
587 mock-, Akt-, and SGK-depleted extracts for the GST-AS peptide kinase assay,  
588 freeze-thawed oocytes in ASW (5 oocytes/ $\mu$ l of ASW) were lysed by adding 6.5  
589 volumes of lysis buffer. The extract was then prepared as described above and mixed  
590 with beads bound to control IgG, the anti-sfAkt-C antibody, or the anti-sfSGK-C

591 antibody. After incubation at 4°C for 45 min, the supernatant was analyzed by

592 immunoblotting or used for the GST-AS peptide kinase assay.

593

594 ***In vitro* phosphorylation of sfCdc25 and sfMyt1.** Recombinant sfCdc25 (final

595 concentration of 5 ng/μl) or sfMyt1 (final concentration of 200 ng/μl) was incubated

596 with N-terminal GST-tagged human SGK3 (final concentration of 10 ng/μl,

597 SignalChem) in reaction buffer (80 mM β-glycerophosphate, 20 mM EGTA, 1 mM

598 MOPS pH 7.0, 1 mM DTT, 1 mM ATP, 5 mM MgCl<sub>2</sub>, and 0.3% NP-40) at 30°C for 50

599 min. The reaction was stopped by adding LSB followed by heating at 95°C for 5 min.

600 Samples were analyzed by immunoblotting with phospho-specific antibodies.

601

602 **GST-AS peptide kinase assay.** Freeze-thawed oocytes in ASW (5 oocytes/μl of ASW)

603 were lysed by adding 6.5 volumes of lysis buffer and then incubating samples on ice for

604 30 min, followed by gentle vortexing. Lysates were centrifuged at 20 k × g at 4°C for

605 15 min. The supernatant was used for the kinase assay. Mock, Akt-, and SGK-depleted

606 extracts were prepared as described above. For the kinase assay, a reaction mixture

607 containing the GST-AS peptide as a substrate (80 mM β-glycerophosphate, 15 mM

608 MgCl<sub>2</sub>, 20 mM EGTA, 10 mM MOPS, pH 7.0, 1 mM DTT, 1× cOmplete EDTA-free, 2

609 mM ATP, 0.5 mM sodium orthovanadate, 1 μM okadaic acid, 0.1 mg/ml GST-AS

610 peptide, and 0.3% NP-40) was added to an equal volume of the extract. After incubation

611 at 30°C, the reaction solution was mixed with LSB, heated at 95°C for 5 min, and then

612 analyzed by immunoblotting.

613

614 **Statistical analysis.** Statistical significance was calculated using the unpaired one-tailed  
615 Student's t-test in Microsoft Excel with StatPlus (AnalystSoft). Statistical significance  
616 was defined as  $p < 0.05$ .

617

618 **Accession numbers.** Accession numbers are as follows: LC430700 for sfSGK,  
619 AB076395 for sfCdc25, AB060280 for sfMyt1, AB060291 for sfAkt, LC017891 for  
620 sfG $\beta$ , LC017892 for sfG $\gamma$ , and LC017893 for the sfPI3K catalytic subunit p110 $\beta$ .

621 **Data availability**

622 Data supporting the findings of this study are available within the article or upon  
623 reasonable requests to the corresponding authors.

624

625 **Acknowledgements**

626 We thank E. Okumura for helpful discussions, suggestions, and providing recombinant  
627 Cdc25 and Myt1, as well as M. Terasaki for providing the pSP64-S vector. This work  
628 was supported by grants-in-aid to T.K. from JSPS [grant numbers 25291043,  
629 16H04783] and Takeda Science Foundation.

630

631 **Author contributions**

632 D.H. designed and performed all the experiments. E.H. and K.C. generated the  
633 anti-sfSGK-C antibody. All authors discussed the results. D.H. and T.K. wrote the  
634 manuscript. T.K. obtained funding and supervised the study.

635

636 **Competing interests**

637 The authors declare no competing interests.

638

639 **Materials and correspondence**

640 Correspondence and requests for materials should be addressed to D.H. and T.K.

641 **References**

- 642 1. Dunphy, W. G. & Newport, J. W. Unraveling of mitotic control mechanisms. *Cell*  
643 **55**, 925-928 (1988).
- 644 2. Hunt, T. Maturation promoting factor, cyclin and the control of M-phase. *Curr.*  
645 *Opin. Cell Biol.* **1**, 268-274 (1989).
- 646 3. Nurse, P. Universal control mechanism regulating onset of M-phase. *Nature* **344**,  
647 503-508 (1990).
- 648 4. Lew, D.J. & Kornbluth, S. Regulatory roles of cyclin dependent kinase  
649 phosphorylation in cell cycle control. *Curr. Opin. Cell Biol.* **8**,795-804 (1996).
- 650 5. Lindqvist, A., Rodríguez-Bravo, V. & Medema, R. H. The decision to enter  
651 mitosis: feedback and redundancy in the mitotic entry network. *J. Cell Biol.* **185**,  
652 193-202 (2009).
- 653 6. Qian, J., Winkler, C. & Bollen, M. 4D-networking by mitotic phosphatases. *Curr.*  
654 *Opin. Cell Biol.* **25**, 697-703 (2013).
- 655 7. Kishimoto, T. Entry into mitosis: a solution to the decades-long enigma of MPF.  
656 *Chromosoma* **124**, 417-428 (2015).
- 657 8. Hégarat, N., Rata, S. & Hochegger, H. Bistability of mitotic entry and exit switches  
658 during open mitosis in mammalian cells. *Bioessays* 627-643 (2016).
- 659 9. O'Farrell, P. H. Triggering the all-or-nothing switch into mitosis. *Trends Cell*  
660 *Biol.* **11**, 512-519 (2001).
- 661 10. Rieder, C. L. Mitosis in vertebrates: the G2/M and M/A transitions and their  
662 associated checkpoints. *Chromosome Res.* **19**, 291-306 (2011).
- 663 11. Thomas, Y. et al. Cdk1 Phosphorylates SPAT-1/Bora to promote Plk1 activation  
664 in *C. elegans* and human cells. *Cell Rep.* **15**, 510-518 (2016).

- 665 12. Gheghiani, L., Loew, D., Lombard, B., Mansfeld, J. & Gavet, O. PLK1 activation  
666 in late G2 sets up commitment to mitosis. *Cell Rep.* **19**, 2060-2073 (2017).
- 667 13. Vigneron, S. et al. Cyclin A-cdk1-dependent phosphorylation of Bora is the  
668 triggering factor promoting mitotic entry. *Dev Cell.* **45**, 637-650 (2018).
- 669 14. Okano-Uchida, T. et al. Distinct regulators for Plk1 activation in starfish meiotic  
670 and early embryonic cycles. *EMBO J.* **22**, 5633-5642 (2003).
- 671 15. Masui, Y. Meiotic arrest in animal oocytes. *Biology of Fertilization* **1**, 189–219  
672 (Academic Press, San Diego, 1985).
- 673 16. Kishimoto, T. MPF-based meiotic cell cycle control: Half a century of lessons  
674 from starfish oocytes. *Proc. Jpn. Acad. Ser. B* **94**, 180-203 (2018).
- 675 17. Kobayashi, H. et al. On the synthesis and destruction of A- and B-type cyclins  
676 during oogenesis and meiotic maturation in *Xenopus laevis*. *J. Cell Biol.* **114**, 755-765  
677 (1991).
- 678 18. Minshull, J., Murray, A., Colman, A. & Hunt, T. *Xenopus* oocyte maturation does  
679 not require new cyclin synthesis. *J. Cell Biol.* **114**, 767-772 (1991).
- 680 19. Okano-Uchida, T. et al. *In vivo* regulation of cyclin A/Cdc2 and cyclin B/Cdc2  
681 through meiotic and early cleavage cycles in starfish. *Dev. Biol.* **197**, 39-53 (1998).
- 682 20. Nebreda, A. R. & Ferby, I. Regulation of the meiotic cell cycle in oocytes. *Curr.*  
683 *Opin. Cell Biol.* **12**, 666-675 (2000).
- 684 21. Kishimoto, T. Cell-cycle control during meiotic maturation. *Curr. Opin. Cell Biol.*  
685 **2003** **15**, 654-663 (2003).
- 686 22. Pahlavan, G. et al. Characterization of polo-like kinase 1 during meiotic  
687 maturation of the mouse oocyte. *Dev. Biol.* **220**, 392-400 (2000).
- 688 23. Gaffré, M. et al. A critical balance between Cyclin B synthesis and Myt1 activity



- 689 controls meiosis entry in *Xenopus* oocytes. *Development* **138**, 3735-3744 (2011).
- 690 24. Maton, G. et al. Cdc2-cyclin B triggers H3 kinase activation of Aurora-A in  
691 *Xenopus* oocytes. *J. Biol. Chem.* **278**, 21439-21449 (2003).
- 692 25. Abe, Y., Okumura, E., Hosoya, T., Hirota, T. & Kishimoto, T. A single starfish  
693 Aurora kinase performs the combined functions of Aurora-A and Aurora-B in human  
694 cells. *J. Cell Sci.* **123**, 3978-3988 (2010).
- 695 26. Komrskova, P. et al. Aurora kinase A is not involved in CPEB1 phosphorylation  
696 and cyclin B1 mRNA polyadenylation during meiotic maturation of porcine oocytes.  
697 *PLoS One* **9**, e101222 (2014). doi: 10.1371/journal.pone.0101222.
- 698 27. Maller, J. L. & Krebs, E. G. Progesterone-stimulated meiotic cell division in  
699 *Xenopus* oocytes. Induction by regulatory subunit and inhibition by catalytic subunit of  
700 adenosine 3':5'-monophosphate-dependent protein kinase. *J. Biol. Chem.* **252**,  
701 1712-1718 (1977).
- 702 28. Jaffe, L. A. & Egbert, J. R. Regulation of mammalian oocyte meiosis by  
703 intercellular communication within the ovarian follicle. *Annu. Rev. Physiol.* **79**, 237-260  
704 (2017).
- 705 29. Adhikari, D. & Liu, K. The regulation of maturation promoting factor during  
706 prophase I arrest and meiotic entry in mammalian oocytes. *Mol. Cell. Endocrinol.* **382**,  
707 480-487 (2014).
- 708 30. Haccard, O. & Jesus, C. Redundant pathways for Cdc2 activation in *Xenopus*  
709 oocyte: either cyclin B or Mos synthesis. *EMBO Rep.* **7**, 321-325 (2006).
- 710 31. Haccard, O. & Jesus, C. Oocyte maturation, Mos and cyclins--a matter of  
711 synthesis: two functionally redundant ways to induce meiotic maturation. *Cell Cycle* **5**,  
712 1152-1159 (2006).

- 713 32. Dupré, A., Daldello, E. M., Nairn, A. C., Jesus, C. & Haccard, O.  
714 Phosphorylation of ARPP19 by protein kinase A prevents meiosis resumption in  
715 *Xenopus* oocytes. *Nat. Commun.* **5**, 3318 (2014). doi: 10.1038/ncomms4318.
- 716 33. Okumura, E., Sekiai, T., Hisanaga, S., Tachibana, K. & Kishimoto, T., Initial  
717 triggering of M-phase in starfish oocytes: a possible novel component of  
718 maturation-promoting factor besides cdc2 kinase. *J. Cell Biol.* **132**, 125-135 (1996).
- 719 34. Meijer, L. & Guerrier, P. Maturation and fertilization in starfish oocytes. *Int.*  
720 *Rev. Cytol.* **86**, 129-196 (1984).
- 721 35. Kanatani, H., Shirai, H., Nakanishi, K. & Kurokawa, T. Isolation and  
722 identification on meiosis inducing substance in starfish *Asterias amurensis*. *Nature.* **221**,  
723 273-274 (1969).
- 724 36. Dorée, M. Protein synthesis is not involved in initiation or amplification of  
725 the maturation-promoting factor (MPF) in starfish oocytes. *Exp. Cell Res.* **139**, 127-133  
726 (1982).
- 727 37. Tachibana, K., Tanaka, D., Isobe, T., Kishimoto, T. c-Mos forces the mitotic cell  
728 cycle to undergo meiosis II to produce haploid gametes. *Proc. Natl. Acad. Sci. USA* **97**,  
729 14301-14306 (2000).
- 730 38. Ookata, K., Hisanaga, S., Okano, T., Tachibana, K. & Kishimoto, T. Relocation  
731 and distinct subcellular localization of p34cdc2-cyclin B complex at meiosis reinitiation  
732 in starfish oocytes. *EMBO J.* **11**, 1763–1772 (1992).
- 733 39. Okumura, E. et al. Akt inhibits Myt1 in the signalling pathway that leads to  
734 meiotic G2/M-phase transition. *Nat. Cell Biol.* **4**, 111-116 (2002).
- 735 40. Kanatani, H. & Hiramoto, Y. Site of action of 1-methyladenine in inducing oocyte  
736 maturation in starfish. *Exp. Cell Res.* **61**, 280-284 (1970).

- 737 41. Chiba, K., Kontani, K., Tadenuma, H., Katada, T. & Hoshi, M. Induction of  
738 starfish oocyte maturation by the  $\beta\gamma$  subunit of starfish G protein and possible existence  
739 of the subsequent effector in cytoplasm. *Mol. Biol. Cell* **4**, 1027–1034 (1993).
- 740 42. Jaffe, L. A., Gallo, C. J., Lee, R. H., Ho, Y. K. & Jones, T. L. Oocyte maturation  
741 in starfish is mediated by the  $\beta\gamma$ -subunit complex of a G-protein. *J. Cell Biol.* **121**,  
742 775–783 (1993).
- 743 43. Shilling, F., Chiba, K., Hoshi, M., Kishimoto, T. & Jaffe, L. A. Pertussis toxin  
744 inhibits 1-methyladenine-induced maturation in starfish oocytes. *Dev. Biol.* **133**,  
745 605–608 (1989).
- 746 44. Sadler, K. C. & Ruderman, J. V. Components of the signaling pathway linking the  
747 1-methyladenine receptor to MPF activation and maturation in starfish oocytes. *Dev.*  
748 *Biol.* **197**, 25–38 (1998).
- 749 45. Vanhaesebroeck, B., Guillermet-Guibert, J., Graupera, M. & Bilanges B. The  
750 emerging mechanisms of isoform-specific PI3K signalling. *Nat. Rev. Mol. Cell Biol.* **11**,  
751 329-341 (2010).
- 752 46. Hiraoka, D. et al. PDK1 is required for the hormonal signaling pathway leading to  
753 meiotic resumption in starfish oocytes. *Dev. Biol.* **276**, 330-336 (2004).
- 754 47. Hiraoka, D., Okumura, E., Kishimoto, T. Turn motif phosphorylation negatively  
755 regulates activation loop phosphorylation in Akt. *Oncogene* **30**, 4487-4497 (2011).
- 756 48. Hiraoka, D., Aono, R., Hanada, S., Okumura, E., & Kishimoto, T. Two new  
757 competing pathways establish the threshold for cyclin-B-Cdk1 activation at the meiotic  
758 G2/M transition. *J. Cell Sci.* **129**, 3153-3166 (2016).
- 759 49. Webster, M. K., Goya, L., Ge, Y., Maiyar, A. C. & Firestone, G. L.  
760 Characterization of sgk, a novel member of the serine/threonine protein kinase gene

- 761 family which is transcriptionally induced by glucocorticoids and serum. *Mol. Cell. Biol.*  
762 **13**, 2031-2040 (1993).
- 763 50. Lien, E. C., Dibble, C. C. & Toker, A. PI3K signaling in cancer: beyond AKT.  
764 *Curr. Opin. Cell Biol.* **45**, 62-71(2017).
- 765 51. Pearce, L. R., Komander, D. & Alessi, D. R. The nuts and bolts of AGC protein  
766 kinases. *Nat. Rev. Mol. Cell Biol.* **11**, 9-22 (2010).
- 767 52. Kobayashi, T. & Cohen, P. Activation of serum- and glucocorticoid-regulated  
768 protein kinase by agonists that activate phosphatidylinositide 3-kinase is  
769 mediated by 3-phosphoinositide-dependent protein kinase-1 (PDK1) and PDK2.  
770 *Biochem. J.* **339**, 319-328 (1999).
- 771 53. García-Martínez, J. M. & Alessi, D. R. mTOR complex 2 (mTORC2) controls  
772 hydrophobic motif phosphorylation and activation of serum- and  
773 glucocorticoid-induced protein kinase 1 (SGK1). *Biochem. J.* **416**, 375-385 (2008).
- 774 54. Hosoda, E. et al. SGK regulates meiotic resumption in ovarian starfish oocytes via  
775 intracellular pH-increase and cyclin B-Cdk1 activation. Accompanying manuscript  
776 (2018)
- 777 55. Andjelković, M. et al. Activation and phosphorylation of a pleckstrin homology  
778 domain containing protein kinase (RAC-PK/PKB) promoted by serum and protein  
779 phosphatase inhibitors. *Proc. Natl. Acad. Sci. USA* **93**, 5699-5704 (1996).
- 780 56. Virbasius, J. V. et al. Activation of the Akt-related cytokine-independent survival  
781 kinase requires interaction of its phox domain with endosomal phosphatidylinositol  
782 3-phosphate. *Proc. Natl. Acad. Sci. USA* **98**, 12908-12913 (2001).
- 783 57. Kohn, A. D., Takeuchi, F. & Roth, R. A. Akt, a pleckstrin homology domain  
784 containing kinase, is activated primarily by phosphorylation. *J. Biol. Chem.* **271**,

- 785 21920-21926 (1996).
- 786 58. Lang, F. et al. (Patho)physiological significance of the serum- and  
787 glucocorticoid-inducible kinase isoforms. *Physiol. Rev.* **86**, 1151-1178 (2006).
- 788 59. Bruhn, M. A., Pearson, R. B., Hannan, R. D. & Sheppard, K. E. AKT-independent  
789 PI3-K signaling in cancer - emerging role for SGK3. *Cancer Manag. Res.* **5**, 281-292  
790 (2013).
- 791 60. Liu, D., Yang, X. & Songyang, Z. Identification of CISK, a new member of the  
792 SGK kinase family that promotes IL-3-dependent survival. *Curr. Biol.* **10**, 1233-1236  
793 (2000).
- 794 61. Malik, N. et al. Mechanism of activation of SGK3 by growth factors via the Class  
795 1 and Class 3 PI3Ks. *Biochem. J.* **475**, 117-135 (2018).
- 796 62. Tsao, P. I. & von Zastrow, M. Diversity and specificity in the regulated endocytic  
797 membrane trafficking of G-protein-coupled receptors. *Pharmacol. Ther.* **89**, 139-147  
798 (2001).
- 799 63. Terasaki, M., Okumura, E., Hinkle, B. & Kishimoto, T. Localization and  
800 dynamics of Cdc2-cyclin B during meiotic reinitiation in starfish oocytes. *Mol. Biol.*  
801 *Cell.* **14**, 4685-4694 (2003).
- 802 64. Laemmli, U. K. Cleavage of structural proteins during the assembly of the head of  
803 bacteriophage T4. *Nature* **227**, 680-685 (1970).
- 804 65. Towbin, H., Staehelin, T. & Gordon, J. Electrophoretic transfer of proteins from  
805 polyacrylamide gels to nitrocellulose sheets: procedure and some applications. *Proc.*  
806 *Natl. Acad. Sci. USA* **76**, 4350-4354 (1979).
- 807 66. Kishimoto, T. Microinjection and cytoplasmic transfer in starfish oocytes.  
808 *Methods. Cell Biol.* **27**, 379-394 (1986).

809

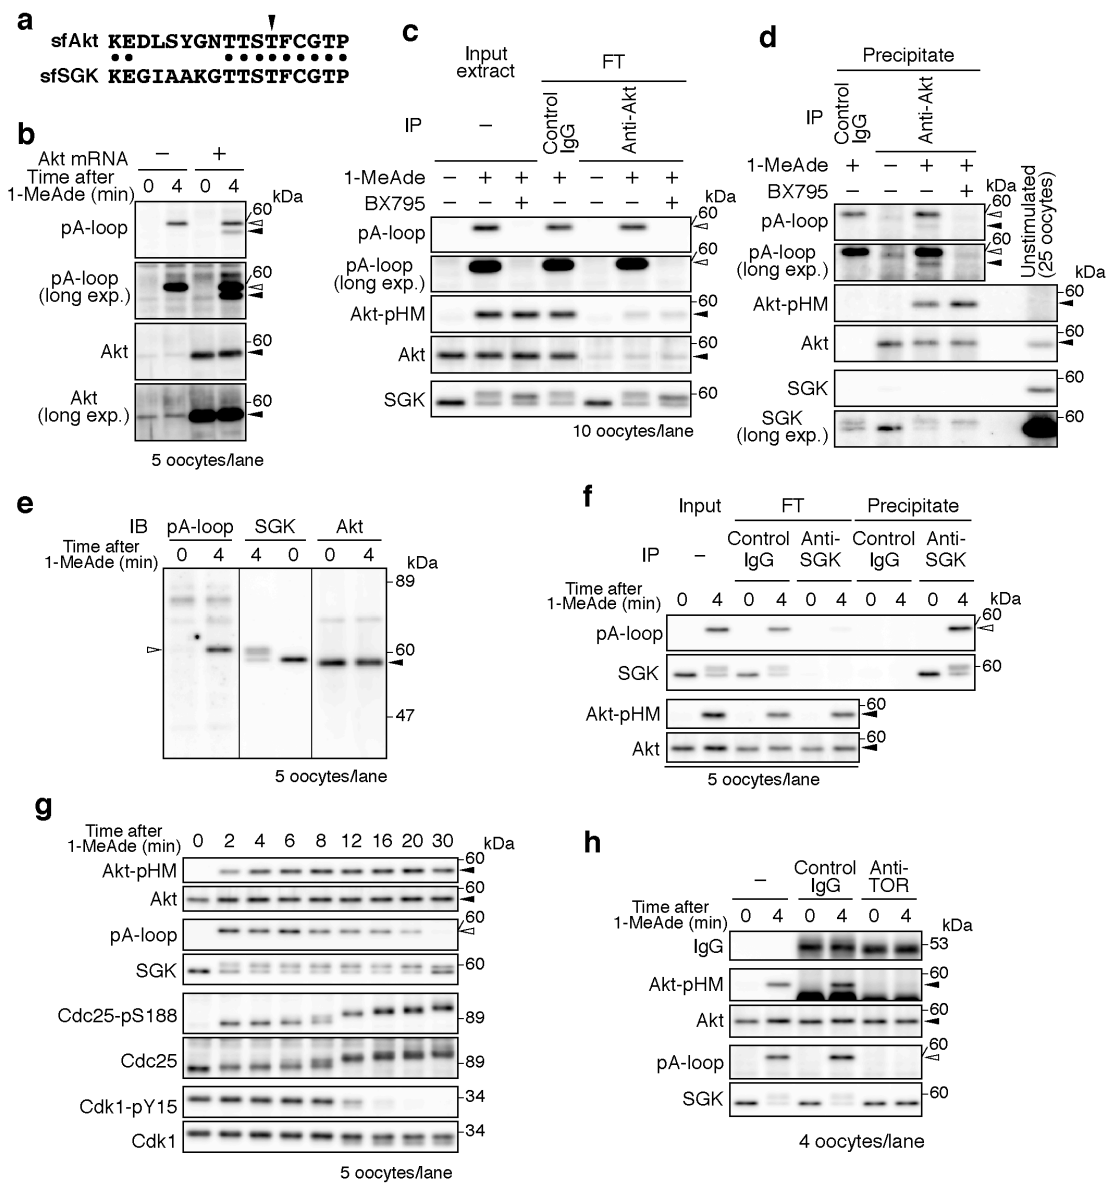

810

811 **Fig. 1** SGK is activated after 1-MeAde stimulation in a PDK1- and TORC2-dependent  
 812 manner. **a** The region of sfAkt used to raise the anti-phospho-A-loop antibody (upper,  
 813 Lys304–Pro320 of sfAkt) is aligned with the corresponding region of sfSGK  
 814 (Lys301–Pro317). The arrowhead indicates the residue phosphorylated by PDK1  
 815 (Thr315 in sfAkt and Thr312 in sfSGK). Dots indicate identical residues. **b** A-loop  
 816 phosphorylation of endogenous sfAkt is undetectable level in whole oocyte extracts.  
 817 Uninjected oocytes and oocytes injected with mRNA encoding untagged sfAkt were  
 818 treated with 1-MeAde, and analyzed by immunoblotting with the anti-phospho-A-loop  
 819 (pA-loop) and anti-sfAkt-C (Akt) antibodies. Closed and open arrowheads indicate the  
 820 positions of Akt and A-loop-phosphorylated SGK (see **e** and **f**), respectively. **c, d**

821 A-loop phosphorylation of endogenous Akt is detectable in immunoprecipitates.  
822 Oocytes were incubated with 1-MeAde in the presence or absence of a PDK1 inhibitor,  
823 BX795, lysed, and subjected to immunoprecipitation with control IgG or the  
824 anti-sfAkt-C antibody. Input and flow-through (FT) extracts (**c**), and precipitates (**d**)  
825 were analyzed by immunoblotting (Akt-pHM represents phosphorylation of Ser477 in  
826 the HM of Akt). A-loop phosphorylation of non-specifically included SGK was  
827 detected in control and Akt immunoprecipitates (**d**, open arrowhead). **e** Unstimulated  
828 and 1-MeAde-treated oocytes were subjected to immunoblotting with  
829 anti-phospho-A-loop (left), anti-sfSGK-C (middle), and anti-sfAkt-C (right) antibodies.  
830 **f** The anti-phospho-A-loop antibody against sfAkt cross-reacts with  
831 A-loop-phosphorylated endogenous SGK. Unstimulated oocytes were treated with  
832 1-MeAde. Immunoprecipitation was performed with control IgG or the anti-sfSGK-C  
833 antibody. Input, flow-through, and precipitates were analyzed by immunoblotting. **g**  
834 SGK is activated simultaneously with Akt activation. Oocytes were treated with  
835 1-MeAde and collected at the indicated time points. Phosphorylation of Akt (Akt-pHM),  
836 SGK (pA-loop), Cdc25 (pS188), and Cdk1 (pY15) were analyzed by immunoblotting.  
837 GVBD occurred around 20 min. **h** SGK activation in starfish oocytes depends on TOR.  
838 Unstimulated oocytes were injected with control IgG or the anti-TOR antibody, treated  
839 with 1-MeAde, and analyzed by immunoblotting. The data are representative of two  
840 independent experiments in **b**, **e**, and **f**; and three independent experiments in **c**, **d**, and **g**.  
841 In all panels, closed and open arrowheads indicate the positions of Akt and  
842 A-loop-phosphorylated sfSGK, respectively.

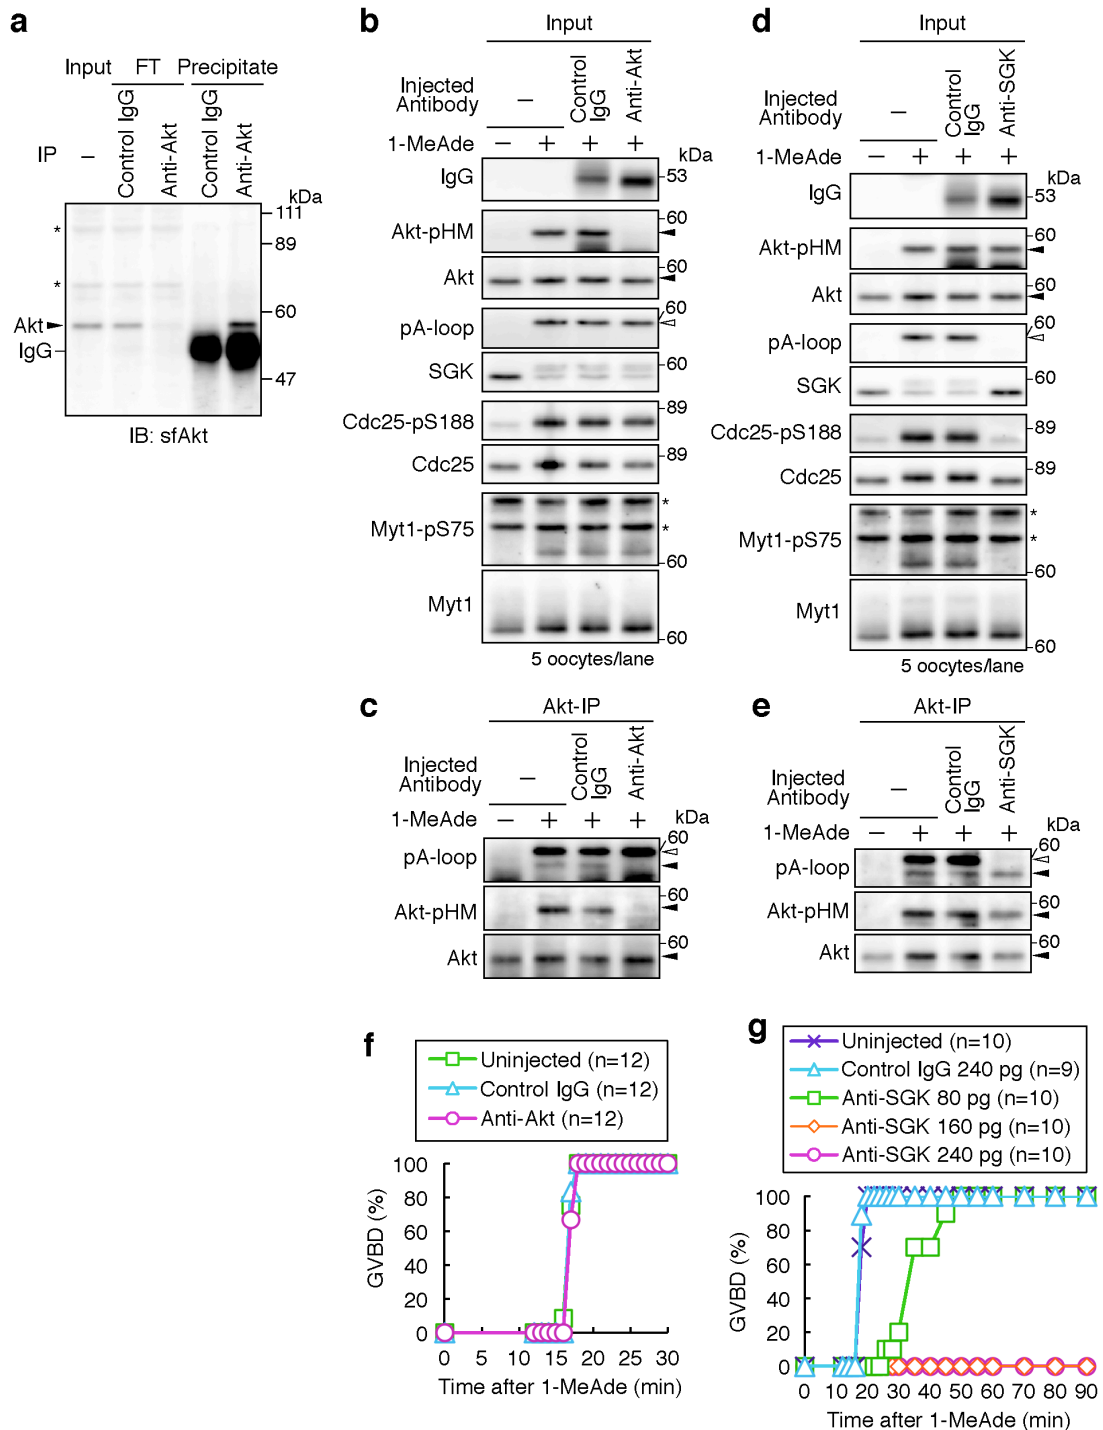

843

844 **Fig. 2** SGK, but not Akt, is required for the meiotic G2/M transition. **a**

845 Immunoprecipitation with control IgG or the anti-sfAkt-C antibody was performed  
 846 using extracts prepared from unstimulated oocytes, followed by immunoblotting with  
 847 the anti-sfAkt-C antibody. **b, c** The anti-sfAkt-C antibody inhibits activation of Akt.

848 Unstimulated oocytes were injected with the anti-sfAkt-C antibody or control IgG and  
 849 then treated with 1-MeAde for 4 min. Immunoprecipitation with the anti-sfAkt-C

850 antibody was performed. Input extracts (**b**, Input) and precipitates (**c**, Akt-IP) were



851 analyzed by immunoblotting. **d, e** The anti-sfSGK-C antibody inhibits activation of  
852 SGK. Unstimulated oocytes were injected with the anti-sfSGK-C antibody or control  
853 IgG and then treated with 1-MeAde for 4 min. Extracts were prepared, and injected IgG  
854 was removed by mixing samples with protein A-Sepharose beads. Thereafter, extracts  
855 were subjected to immunoprecipitation with the anti-sfAkt-C antibody. Input extracts (**d**,  
856 Input) and precipitates (**e**, Akt-IP) were analyzed by immunoblotting. **f** Akt is not  
857 required for the meiotic G2/M transition. Unstimulated oocytes were injected with the  
858 anti-sfAkt-C antibody or control IgG and then treated with 1-MeAde. GVBD was  
859 monitored as a marker of the meiotic G2/M transition. The graph shows the percentage  
860 of oocytes that had undergone GVBD by the indicated time points. “n” indicates the  
861 number of oocytes observed. **g** SGK is required for the meiotic G2/M transition.  
862 Unstimulated oocytes were injected with the indicated amount of the anti-sfSGK-C  
863 antibody or control IgG and then treated with 1-MeAde. GVBD was monitored and  
864 plotted as described in **f**. In all panels, open arrowheads indicate the position of  
865 A-loop-phosphorylated SGK, closed arrowheads indicate the position of Akt, and  
866 asterisks indicate non-specific bands. The data are representative of two independent  
867 experiments in **a-c, f**, and **g**; and three independent experiments in **d** and **e**.

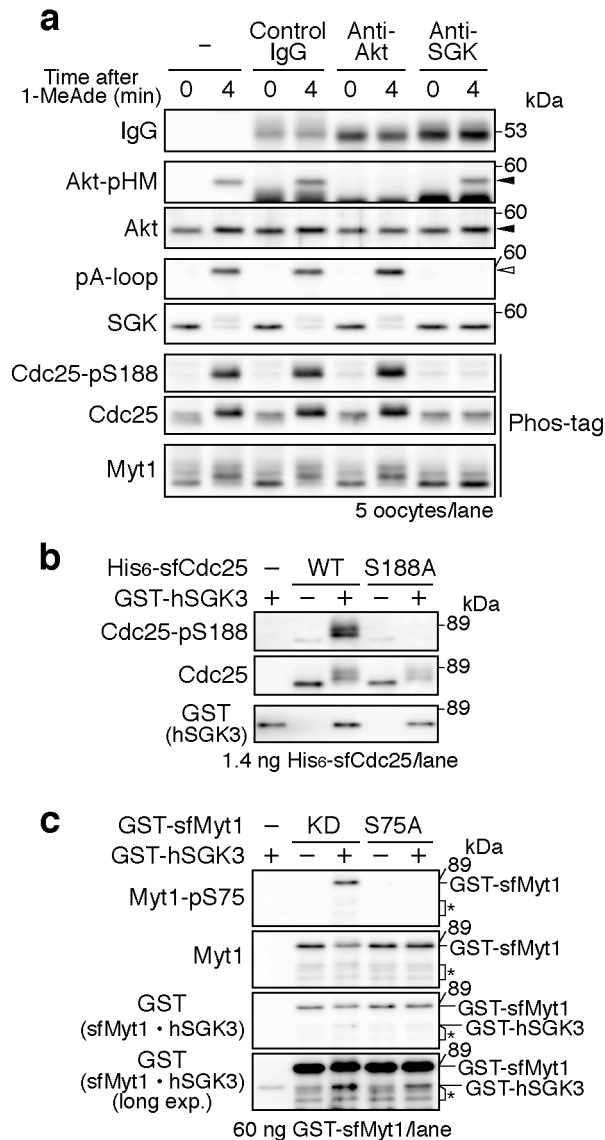

868

869

870 **Fig. 3** SGK directly phosphorylates Cdc25 and Myt1. **a** SGK, but not Akt, is required

871 for Cdk-independent phosphorylation of Cdc25 and Myt1 upon 1-MeAde stimulation.

872 Unstimulated oocytes were injected with the indicated antibodies, treated with 1-MeAde

873 in the presence of roscovitine, and then analyzed by immunoblotting using a normal or

874 Phos-tag-containing SDS-PAGE gel. The open arrowhead indicates the position of

875 A-loop-phosphorylated SGK, while the closed arrowheads indicate the position of Akt.

876 **b** His-tagged recombinant wild-type (WT) sfCdc25 or the S188A mutant was incubated

877 with or without GST-tagged active human SGK3 (hSGK3) in the presence of ATP and

878 MgCl<sub>2</sub>. Thereafter, immunoblotting was performed. **c** GST-tagged recombinant

879 kinase-dead (KD) or the S75A mutant of sfMyt1 was phosphorylated by human SGK3

880 as described in **b**. Asterisks indicate minor fragments of recombinant Myt1. The data in

all panels are representatives of each two independent experiments.

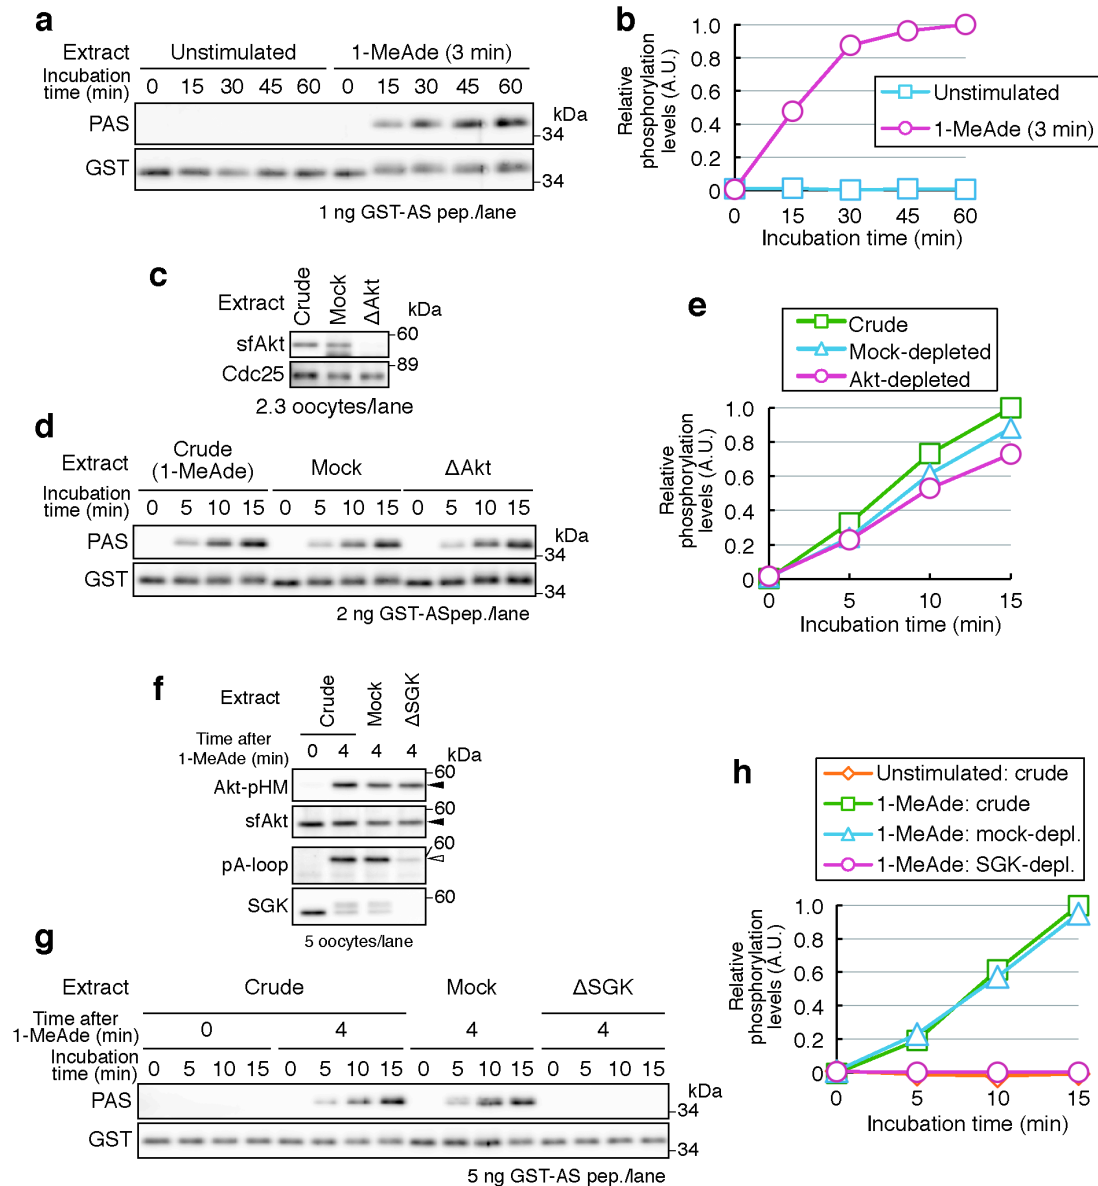

881

882 **Fig. 4** SGK is a major kinase that phosphorylates the Akt/SGK consensus motif in  
 883 starfish oocytes. **a, b** Kinase activity for the AS peptide is detectable in an extract of  
 884 1-MeAde-treated oocytes. Extracts were prepared from unstimulated or  
 885 1-MeAde-treated (3 min) oocytes and incubated with the GST-AS peptide for the  
 886 indicated durations. Phosphorylation of the GST-AS peptide was detected by  
 887 immunoblotting with an anti-pan-phospho-Akt/SGK substrate antibody (PAS), which  
 888 recognizes phosphorylated Ser or Thr in the Akt/SGK consensus motif (**a**).  
 889 Phosphorylation of the GST-AS peptide was quantitated from the immunoblots in **a** and  
 890 normalized against the total amount of the GST-AS peptide. The graph shows the levels  
 891 of phosphorylation relative to that at 60 min (**b**). **c-e** Akt is not responsible for the  
 892 AS-peptide kinase activity in the extract. An extract was prepared from  
 893 1-MeAde-treated oocytes. Immunodepletion was performed with control IgG (mock) or

894 the anti-sfAkt-C antibody ( $\Delta$ Akt). The crude and immunodepleted extracts were  
895 analyzed by immunoblotting (c). The GST-AS peptide kinase assay was performed  
896 using the extracts shown in c (d). Phosphorylation was quantitated as described in a and  
897 b. The graph shows the levels of phosphorylation relative to that at 15 min in the crude  
898 extract (e). f–h SGK is responsible for the AS-peptide kinase activity in the extract. An  
899 extract was prepared from unstimulated or 1-MeAde-treated oocytes. Immunodepletion  
900 was performed with the anti-sfSGK-C antibody (f), the GST-AS peptide kinase assay  
901 was performed (g), and phosphorylation was quantitated (h) as described in c, d, and e.  
902 The open arrowhead indicates the position of A-loop-phosphorylated SGK, while the  
903 closed arrowheads indicate the position of Akt. The data in all panels are representatives  
904 of each two independent experiments.

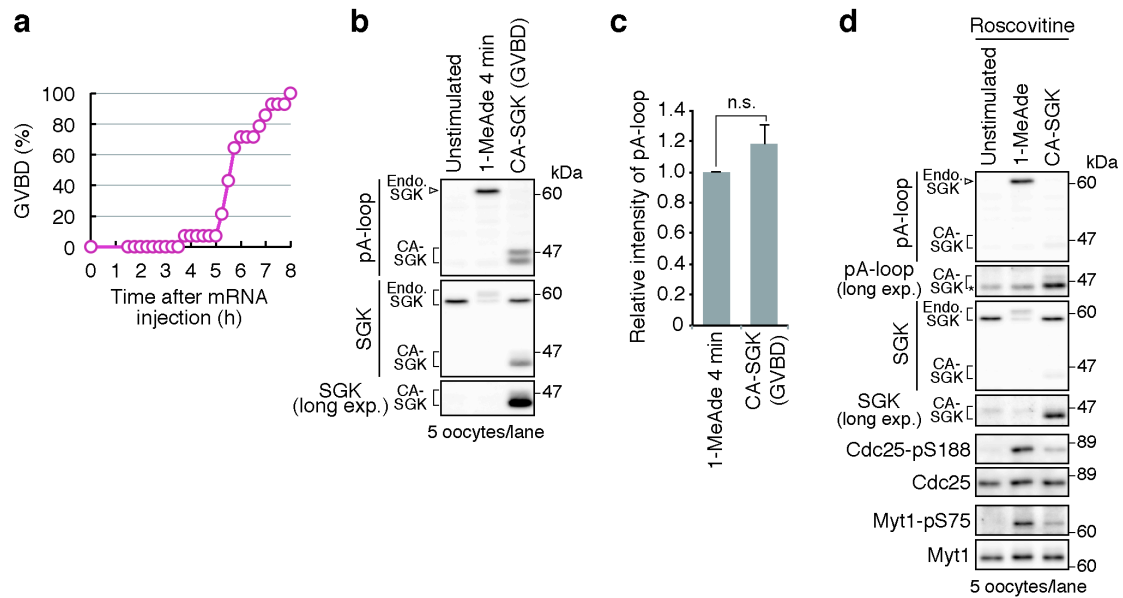

905  
 906 **Fig. 5** SGK is sufficient for the meiotic G2/M transition. **a–c** CA-SGK expression  
 907 induces the meiotic G2/M transition. Unstimulated oocytes were injected with mRNA  
 908 encoding CA-SGK and incubated. GVBD in 14 oocytes was monitored every 15 min.  
 909 The graph shows the percentage of oocytes that had undergone GVBD by the indicated  
 910 time points (**a**). CA-SGK-expressing oocytes at GVBD, unstimulated oocytes, and  
 911 1-MeAde-treated oocytes were analyzed by immunoblotting (**b**). Phosphorylation levels  
 912 of the A-loop of endogenous SGK in 1-MeAde-treated oocytes and CA-SGK at GVBD  
 913 were quantitated from the immunoblots in **b**. The graph shows the relative  
 914 phosphorylation levels (**c**). Data represent mean values  $\pm$  standard deviation from three  
 915 independent experiments.  $P = 0.06$  (one-tailed t-test; not significant, n.s.). **d** CA-SGK  
 916 expression induces regulatory phosphorylation of Cdc25 and Myt1 to trigger cyclin  
 917 B-Cdk1 activation. Unstimulated oocytes were treated with 1-MeAde for 4 min in the  
 918 presence of roscovitine. For expression of CA-SGK, unstimulated oocytes were injected  
 919 with the mRNA, incubated with roscovitine, collected at the time point at which 50% of  
 920 CA-SGK-expressing oocytes exhibited GVBD in the absence of roscovitine (5 h 45 min  
 921 in **a**), and analyzed by immunoblotting. Note that, in the immunoblot of  
 922 phospho-A-loop after a long exposure (pA-loop, long exp.), weak non-specific bands  
 923 were detected at almost the same size as CA-SGK (asterisk). The data are representative  
 924 of three independent experiments in **a**, **b**, and **c**; and two independent experiments in **d**.

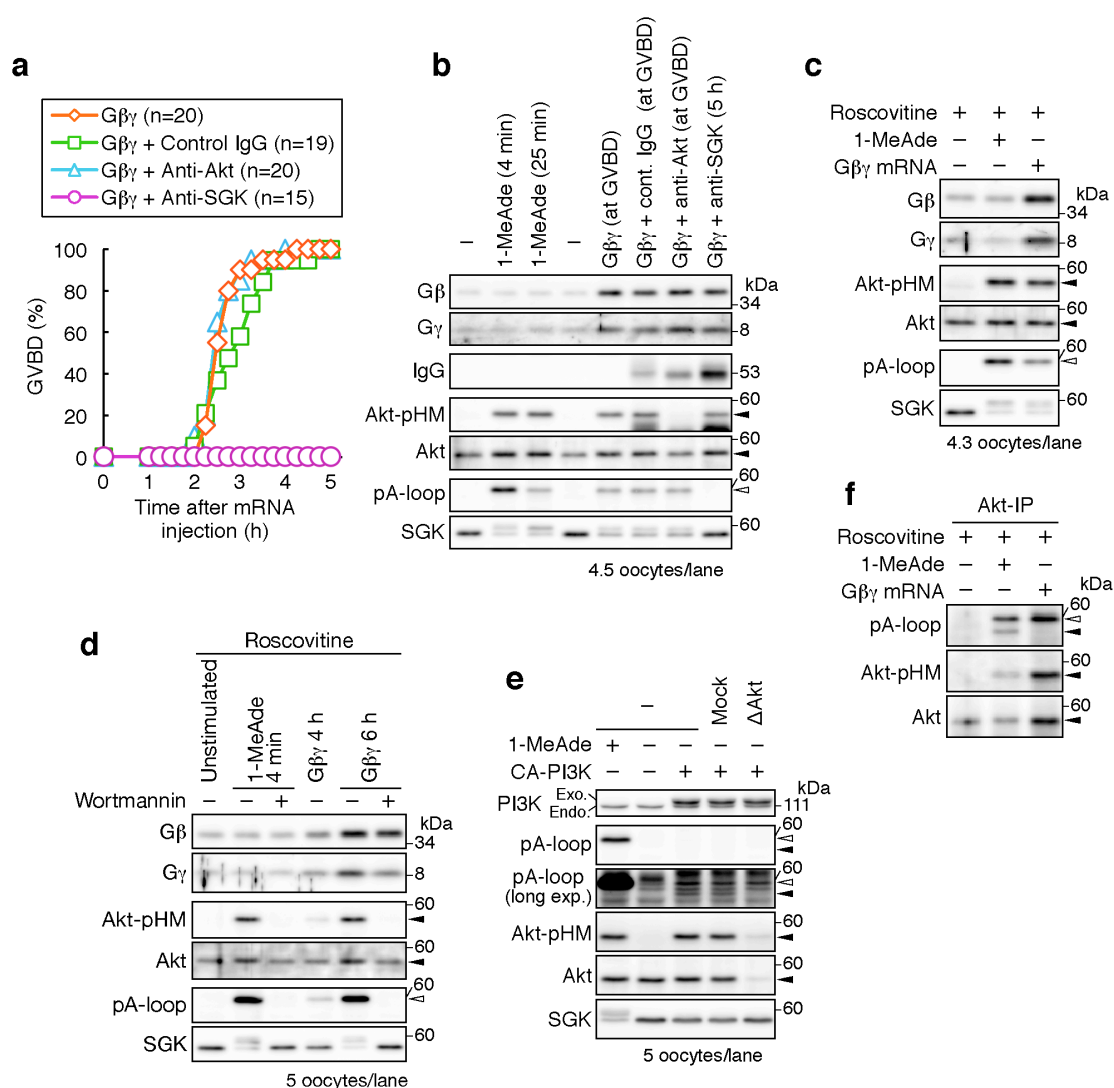

925  
 926 **Fig. 6** SGK is activated by cooperation of the Gβγ-PI3K and atypical Gβγ pathways. **a**,  
 927 **b** Exogenous expression of Gβγ induces the meiotic G2/M transition in a  
 928 SGK-dependent manner. Unstimulated oocytes were injected with the indicated  
 929 antibodies and subsequently injected with mRNA encoding Gβγ. Thereafter, GVBD  
 930 was monitored (**a**). Oocytes were collected when GVBD occurred. Anti-sfSGK  
 931 antibody-injected oocytes, which did not undergo GVBD, were collected at 5 h after  
 932 mRNA injection. For 1-MeAde treatment, unstimulated oocytes were treated with  
 933 1-MeAde for 4 or 25 min (GVBD occurred at approximately 21 min) and then analyzed  
 934 by immunoblotting (**b**). **c** Exogenous Gβγ expression induces SGK activation.  
 935 Unstimulated oocytes were treated with 1-MeAde for 4 min in the presence of  
 936 roscovitine or injected with mRNA encoding Gβγ and then incubated with roscovitine  
 937 for 6 h. Thereafter, extracts were prepared from these oocytes and analyzed by  
 938 immunoblotting. These extracts were also used for immunoprecipitation of Akt in **f**. **d**  
 939 Gβγ-induced SGK activation requires PI3K. Unstimulated oocytes were treated with  
 940 1-MeAde or injected with mRNA encoding Gβγ, incubated in the presence of

941 roscovitine with or without wortmannin, and analyzed by immunoblotting. **e** PI3K is not  
942 sufficient for activation of SGK. Unstimulated oocytes were treated with 1-MeAde for 4  
943 min or injected with mRNA encoding CA-PI3K and incubated for 3 h. Extracts of  
944 CA-PI3K-expressing oocytes were immunodepleted using control IgG (Mock) or the  
945 anti-sfAkt-C antibody ( $\Delta$ Akt). Thereafter, immunoblotting was performed. **f** Expression  
946 of exogenous G $\beta\gamma$  fails to induce A-loop phosphorylation of Akt. Endogenous Akt was  
947 immunoprecipitated from the extracts in **c** and analyzed by immunoblotting. In all  
948 panels, open arrowheads indicate the position of A-loop-phosphorylated SGK, while  
949 closed arrowheads indicate the position of Akt. The data are representative of two  
950 independent experiments in **a**, **b**, **d**, and **e**; and three independent experiments in **c** and **f**.

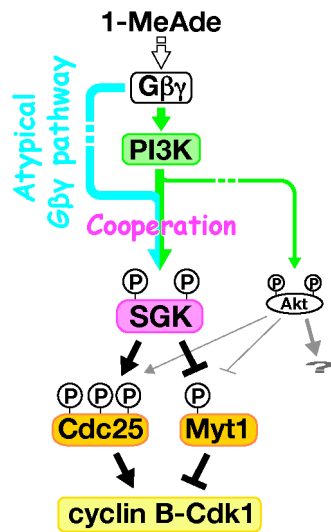

951

952 **Fig. 7** SGK triggers cyclin B-Cdk1 activation in 1-MeAde signaling. Downstream of  
953 1-MeAde stimulation, Gβγ activates the PI3K pathway (green arrow) and the atypical  
954 Gβγ pathway (cyan arrow). SGK is activated by cooperation of these pathways and  
955 subsequently activates and inactivates Cdc25 and Myt1, respectively, via direct  
956 phosphorylation. Consequently, reversal of the balance of Cdc25 and Myt1 activities  
957 triggers cyclin B-Cdk1 activation. Akt is weakly activated after 1-MeAde stimulation,  
958 and may phosphorylate Cdc25 and Myt1 at undetectable levels. However, Akt is  
959 dispensable for cyclin B-Cdk1 activation and may have any other function in oocytes.
